# Supplementary figures and images for: Spatial patterns of neuroimaging biomarker change in individuals from families with autosomal dominant Alzheimer disease: a longitudinal study
Source: PubMed Central journal article supplement — Lancet Neurol. Author manuscript; Available in PMC 2019 Mar 1. (PMC5816717; doi:10.1016/s1474-4422(18)30028-0), 2018-02-01

# Cortical PiB: MC Regional Rate Comparisons

A)

EYO = -25

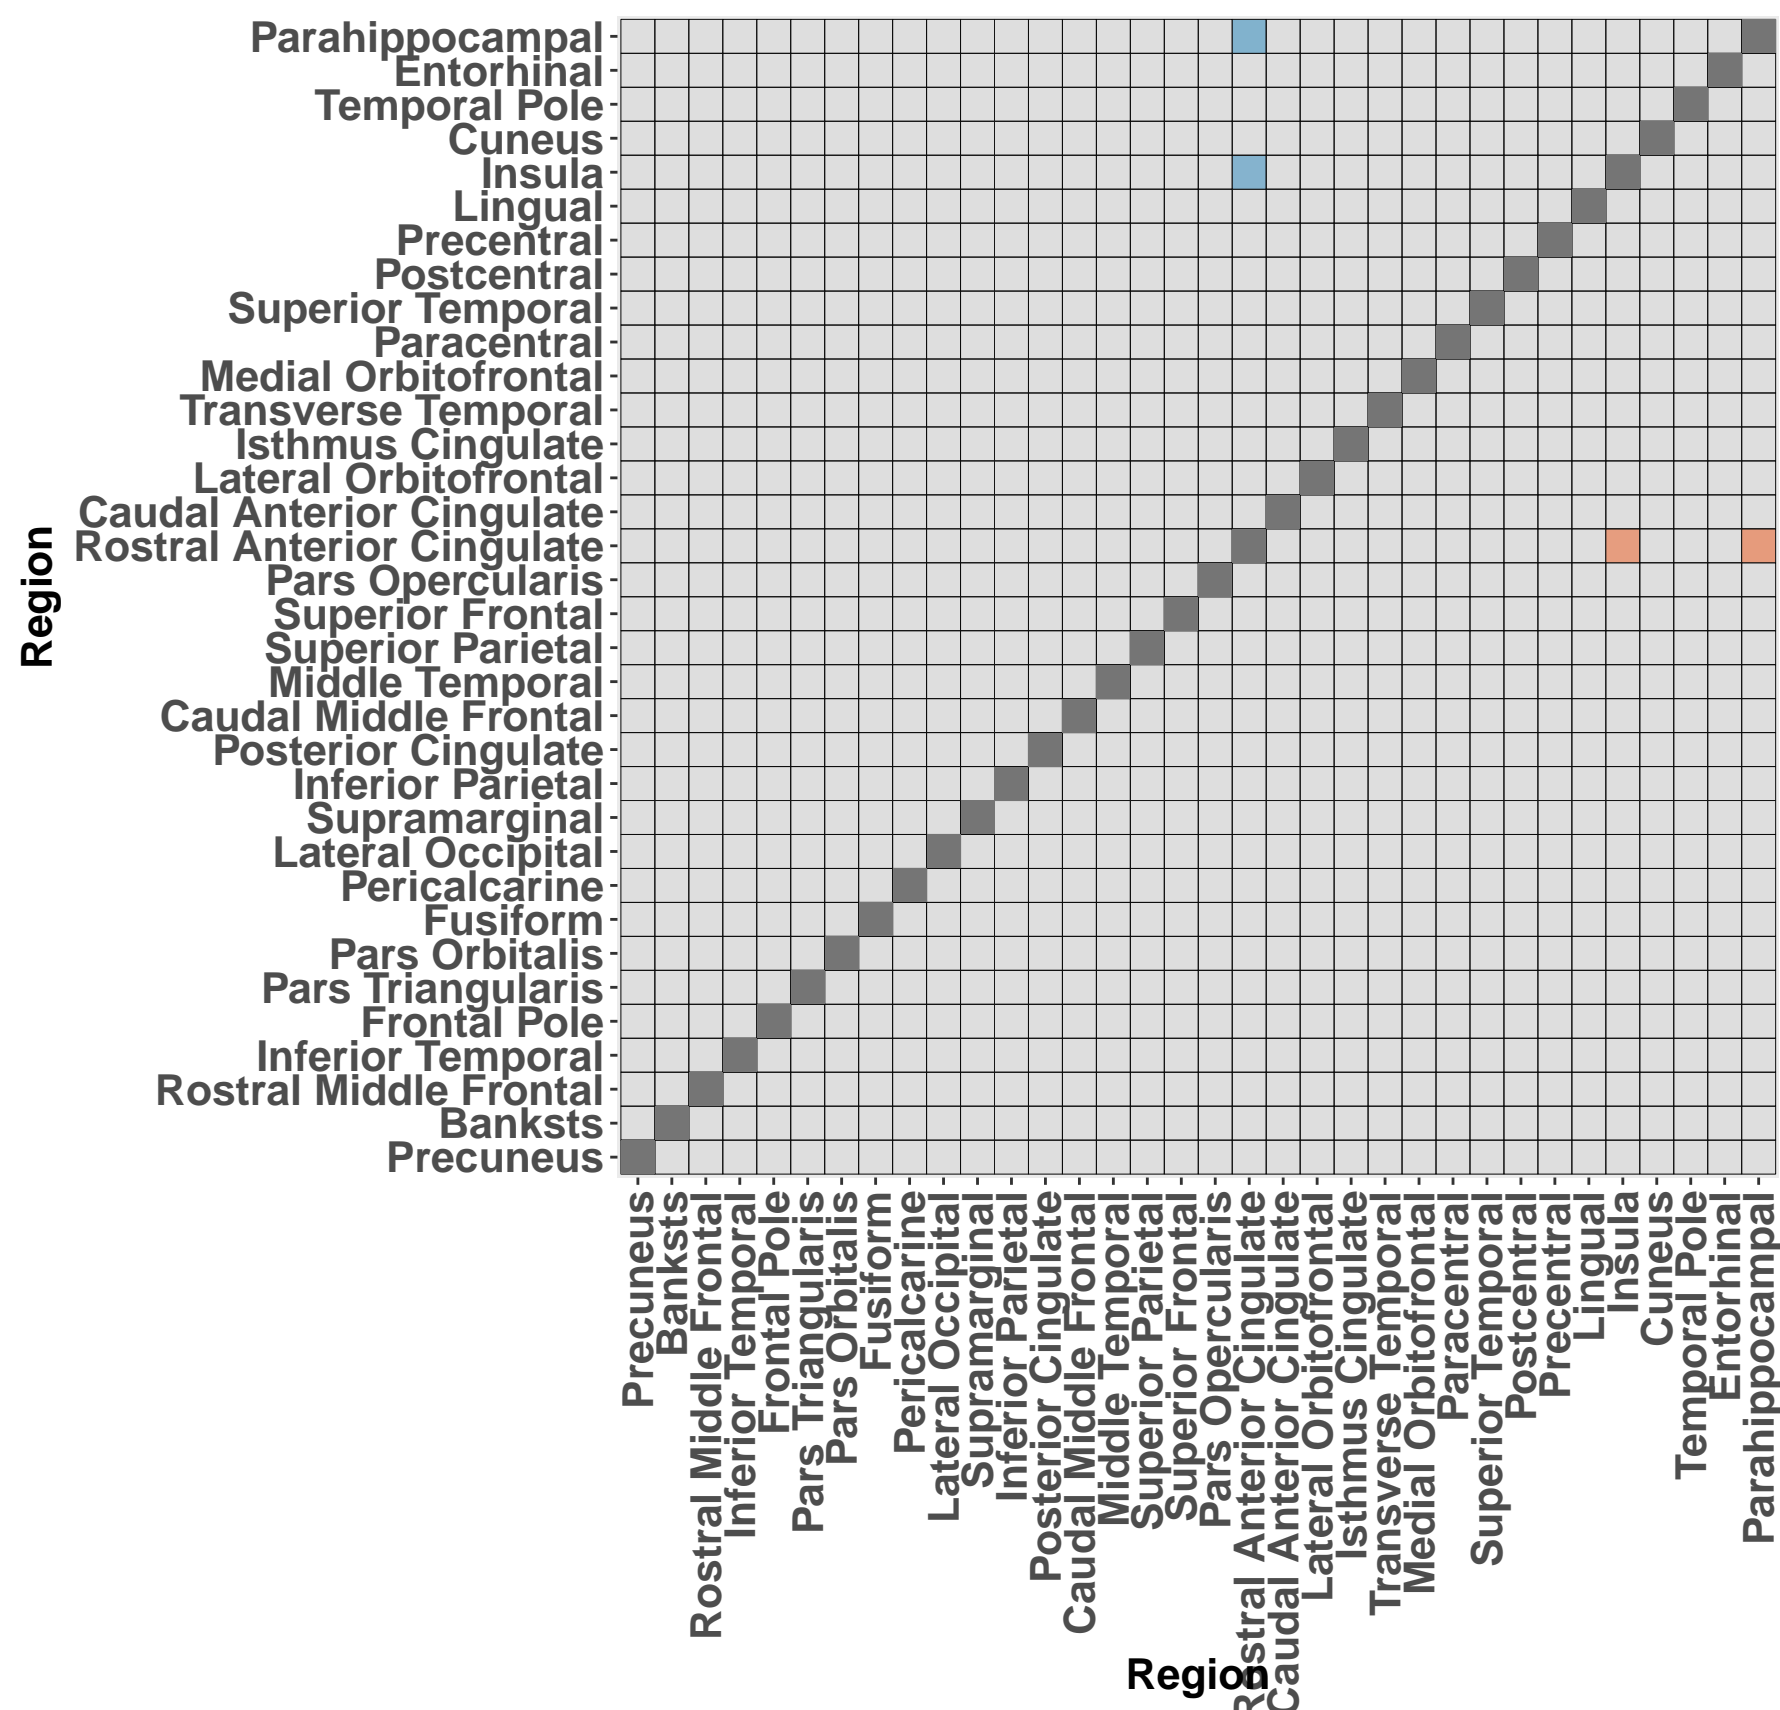

B)

EYO = -15

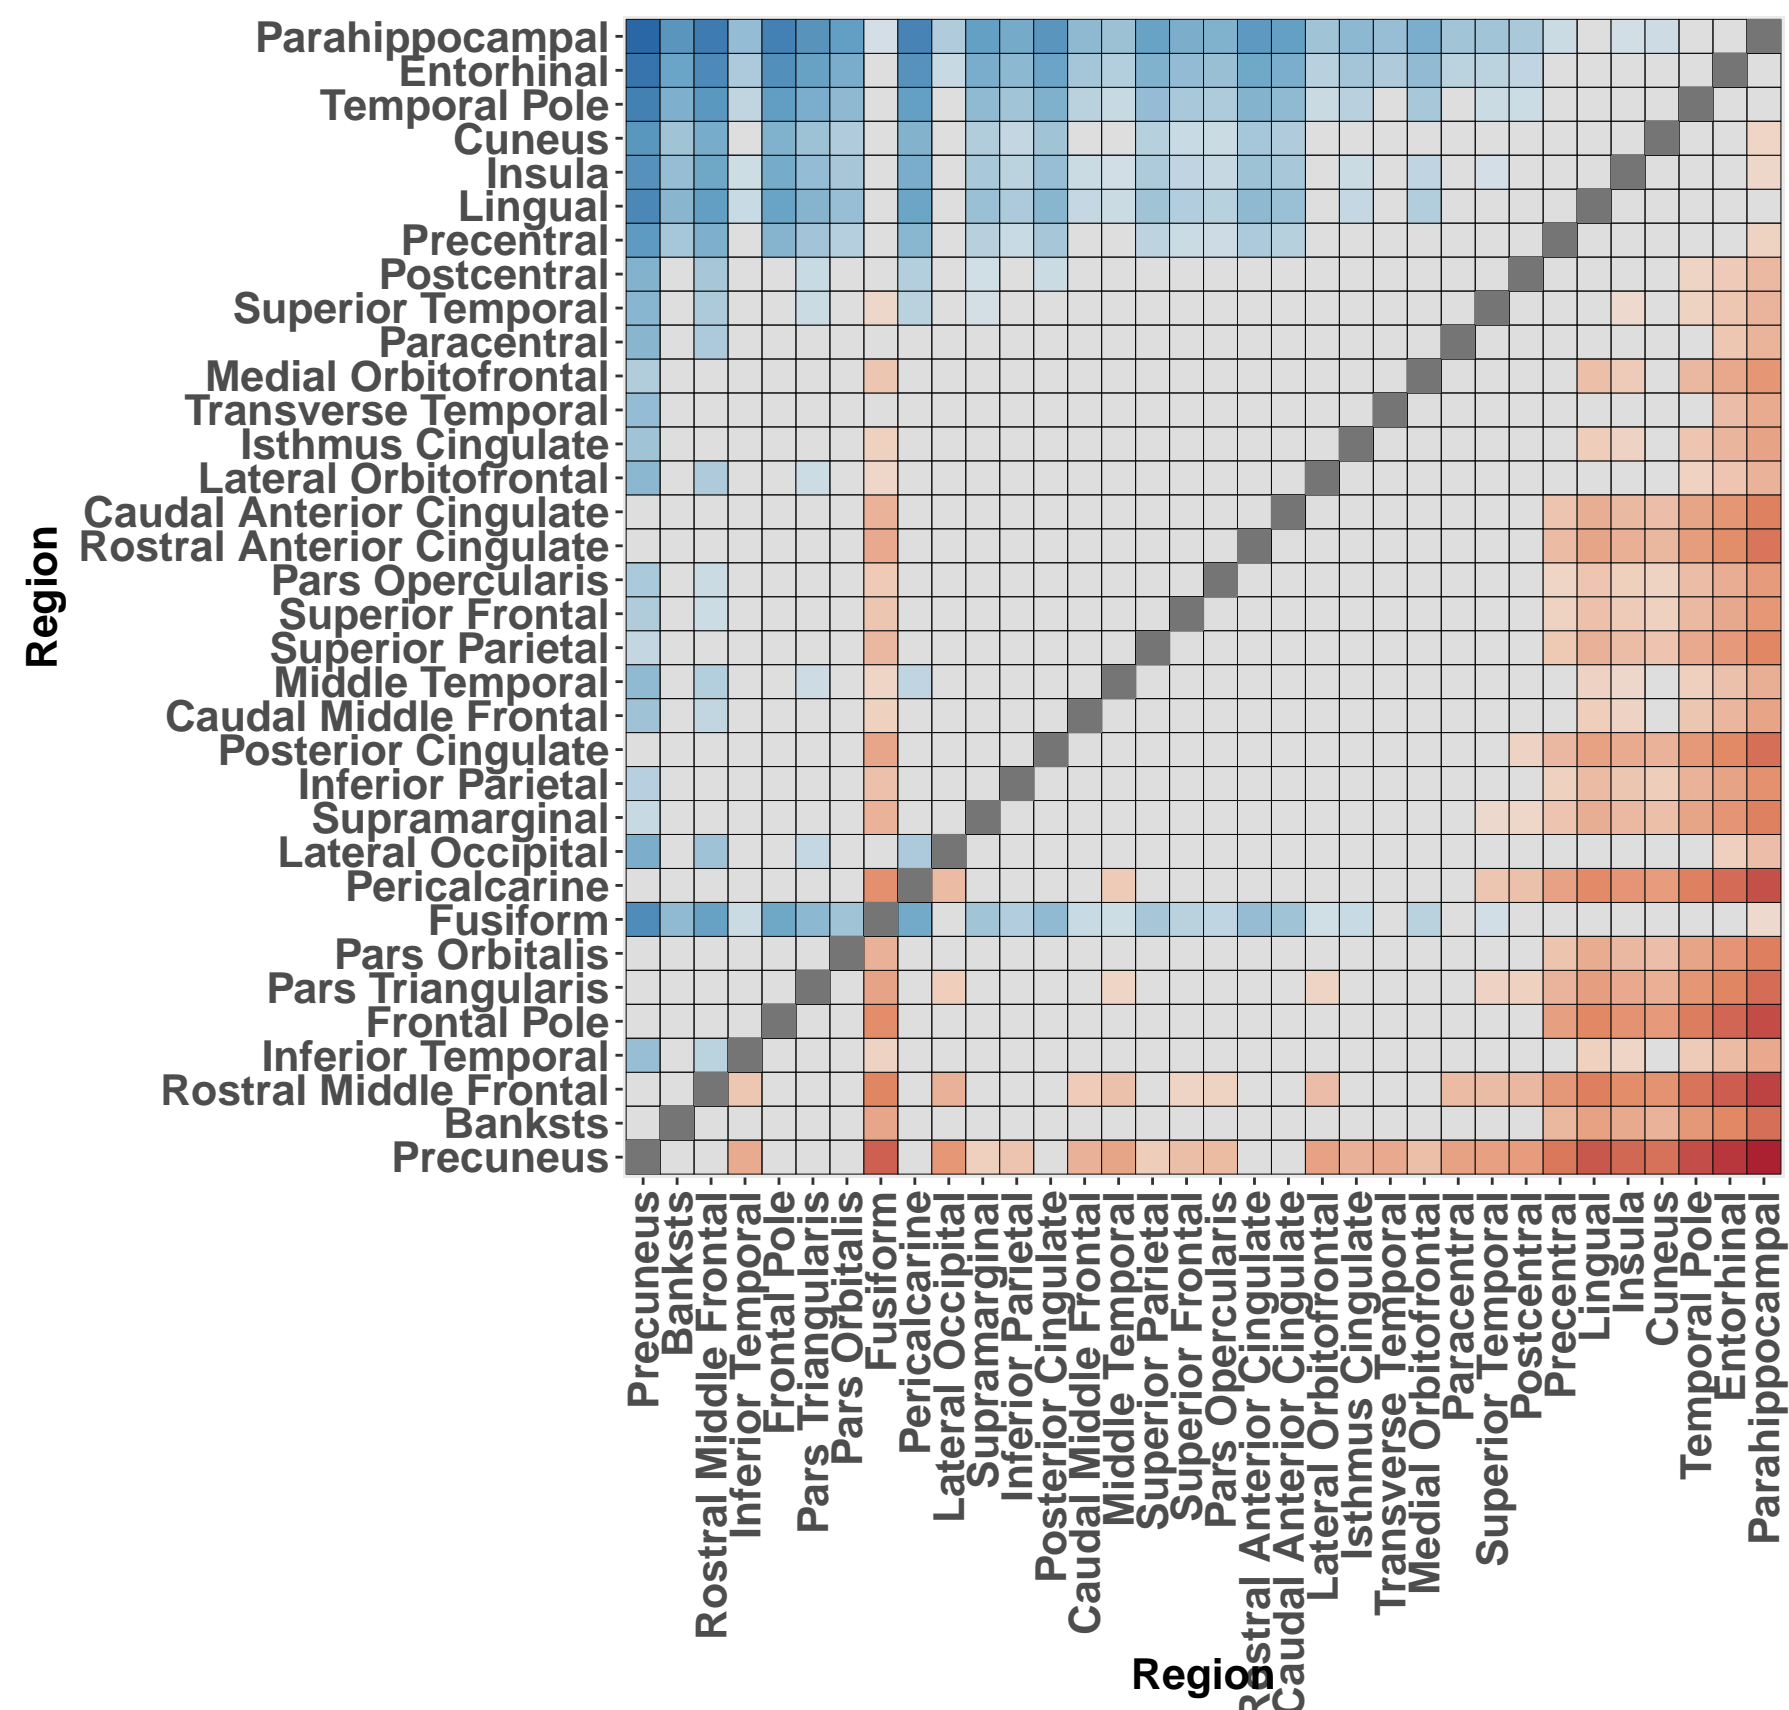

C)

EYO = -5

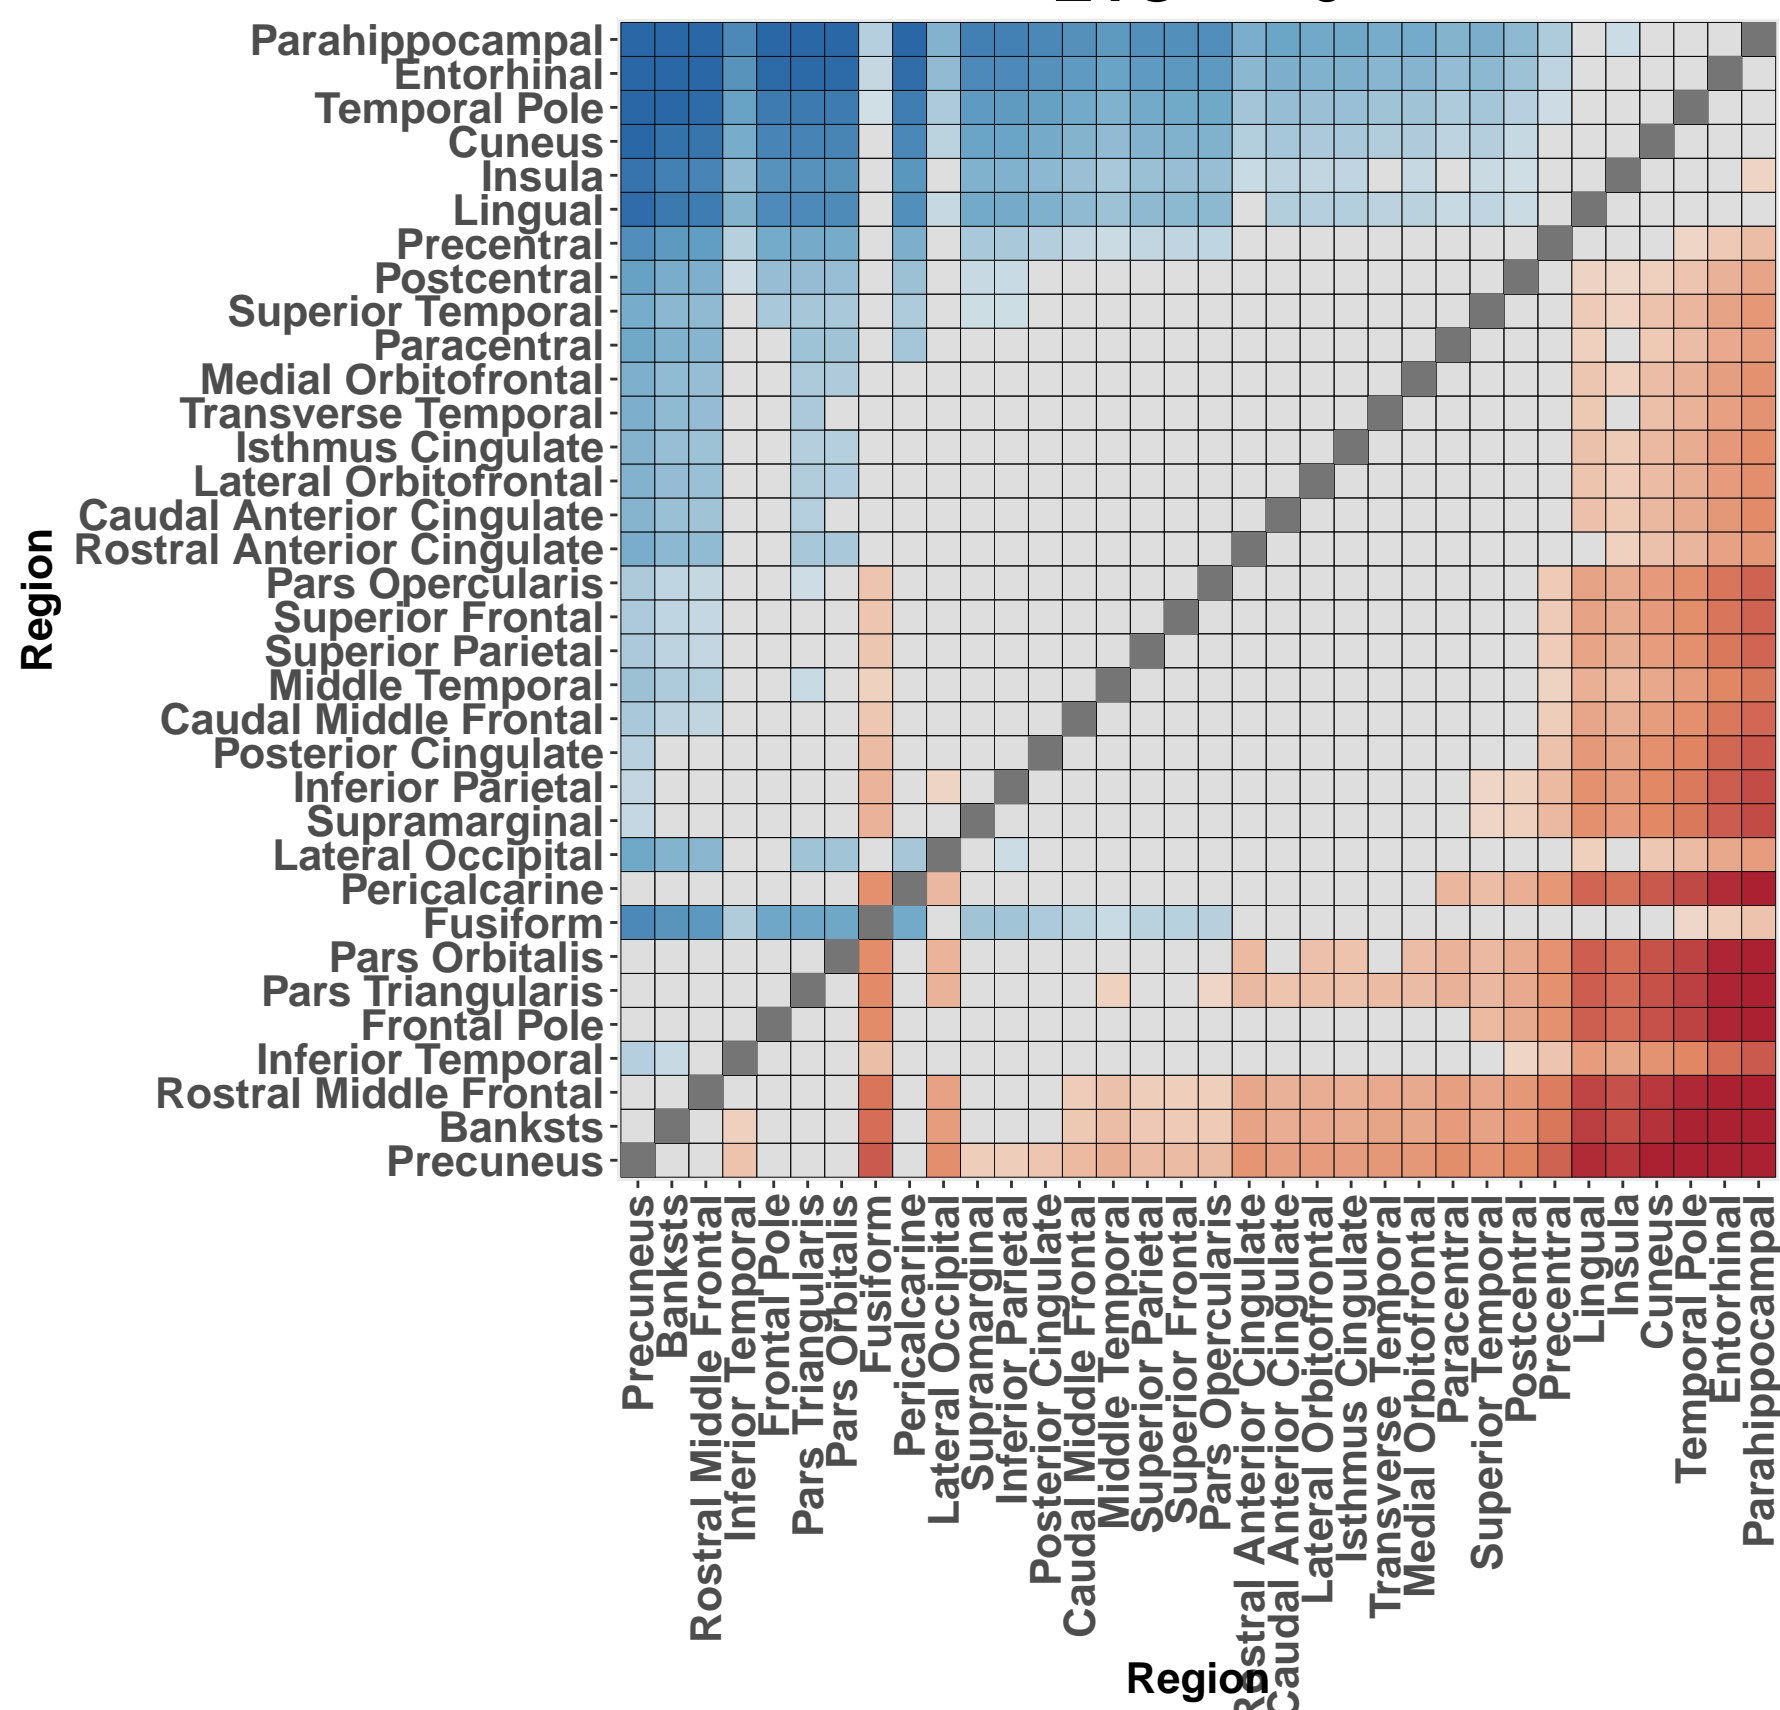

D)

EYO = 5

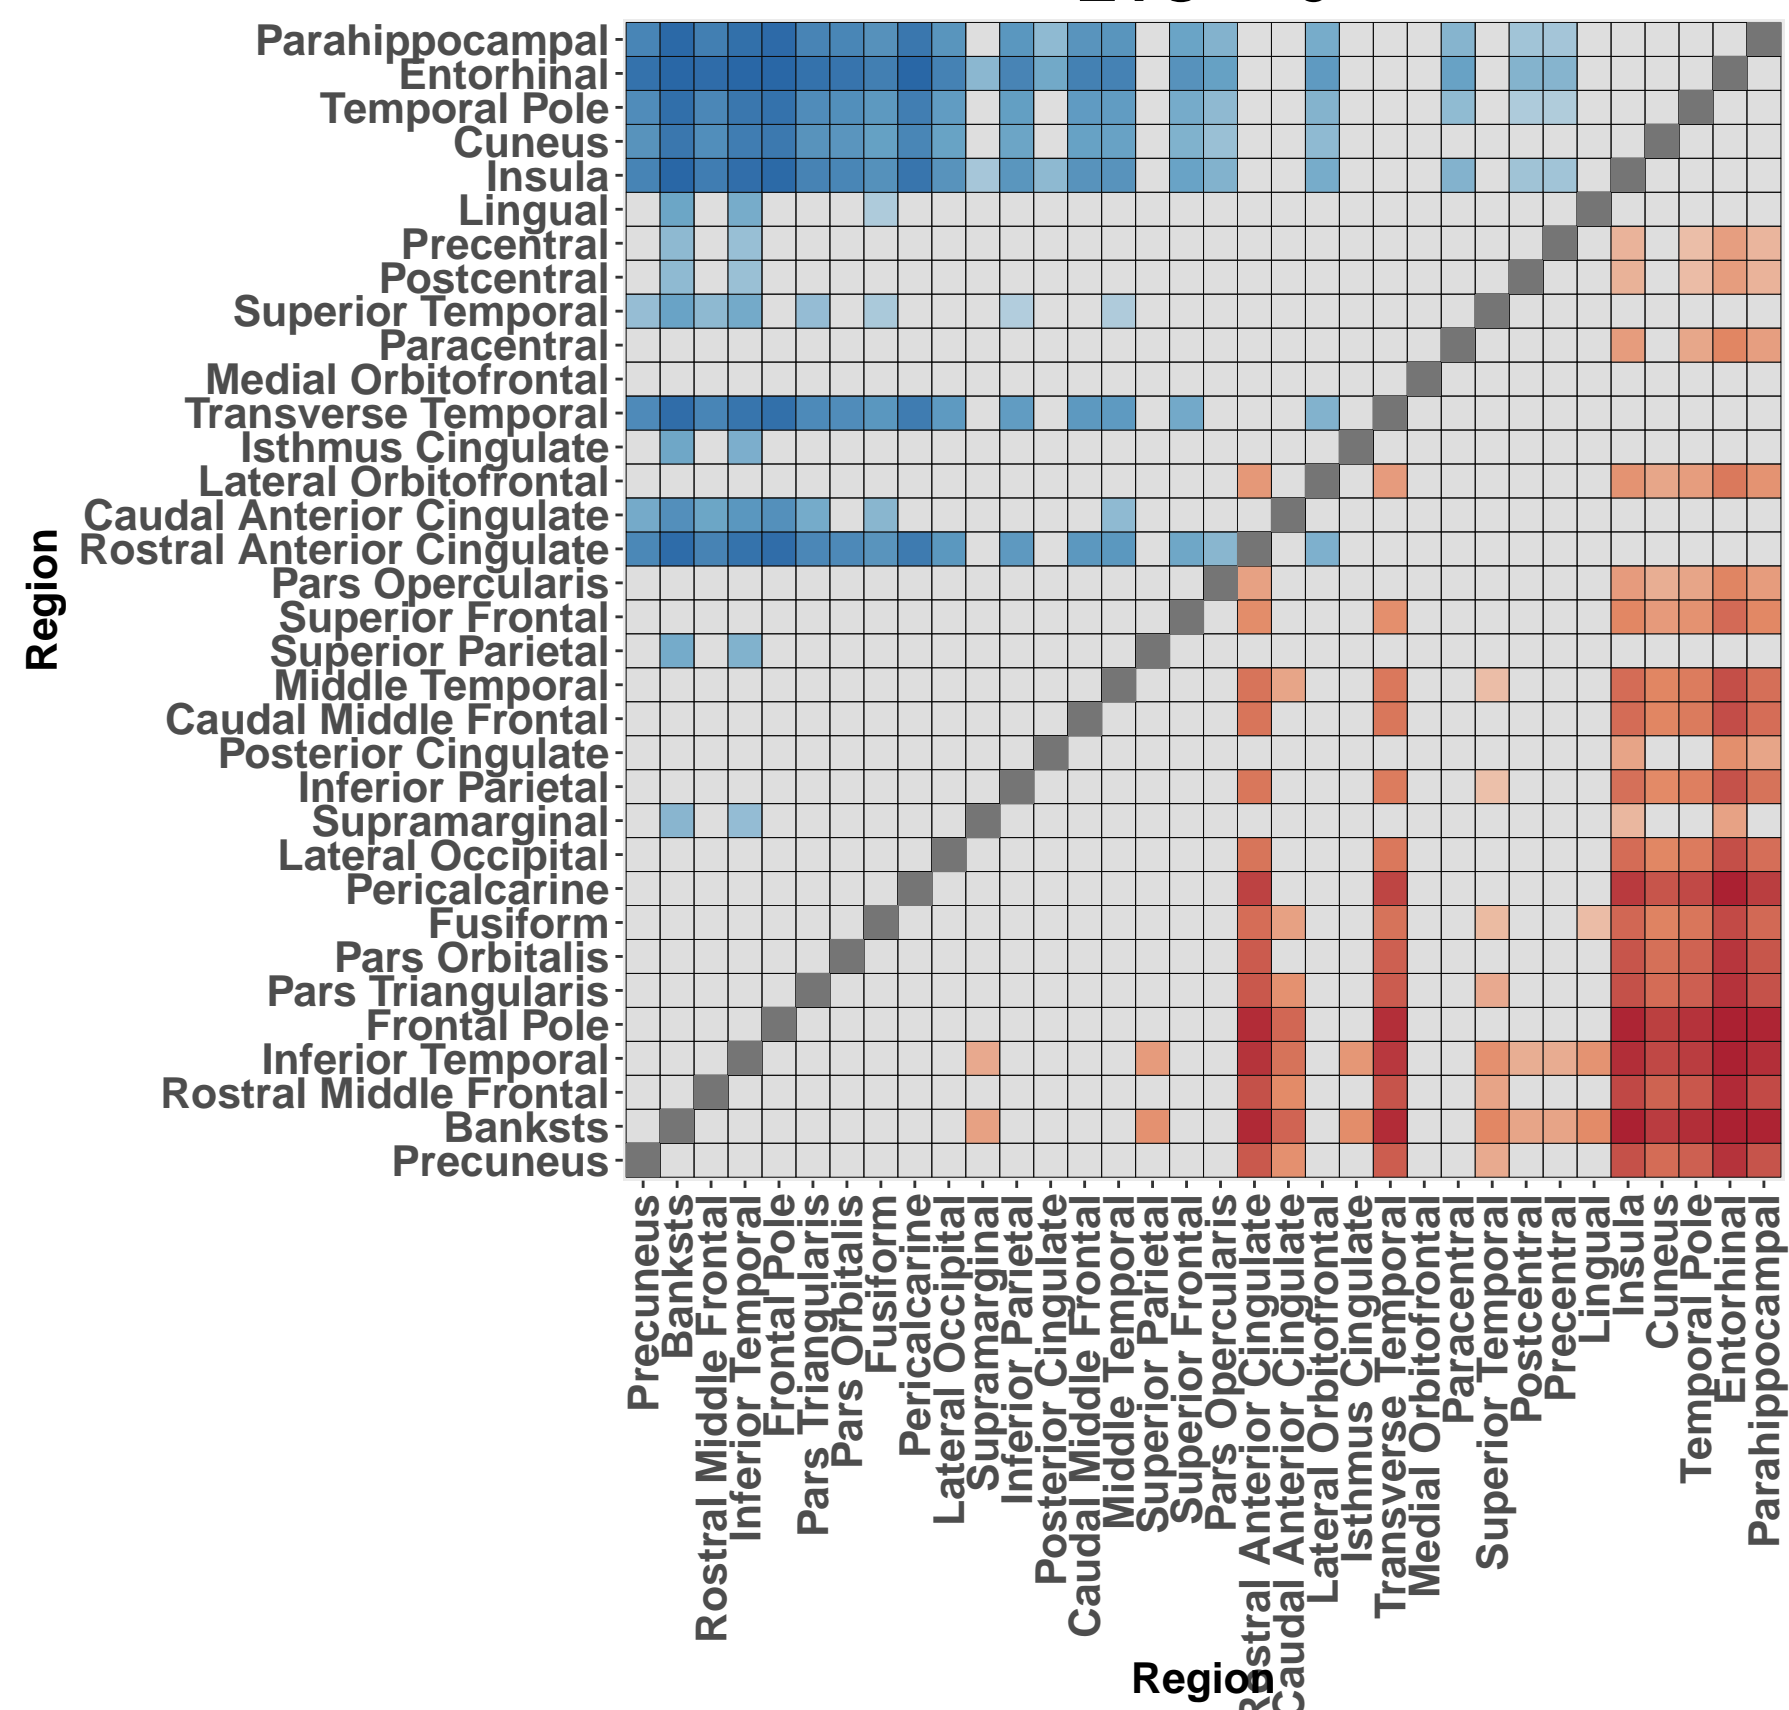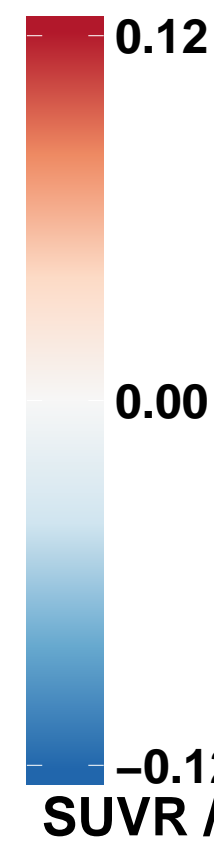

Supplement: NIHMS941123-supplement-3.pdf [file NIHMS941123-supplement-3.pdf]

# Subcortical PiB: MC Regional Rate Comparisons

A)

EYO = -25

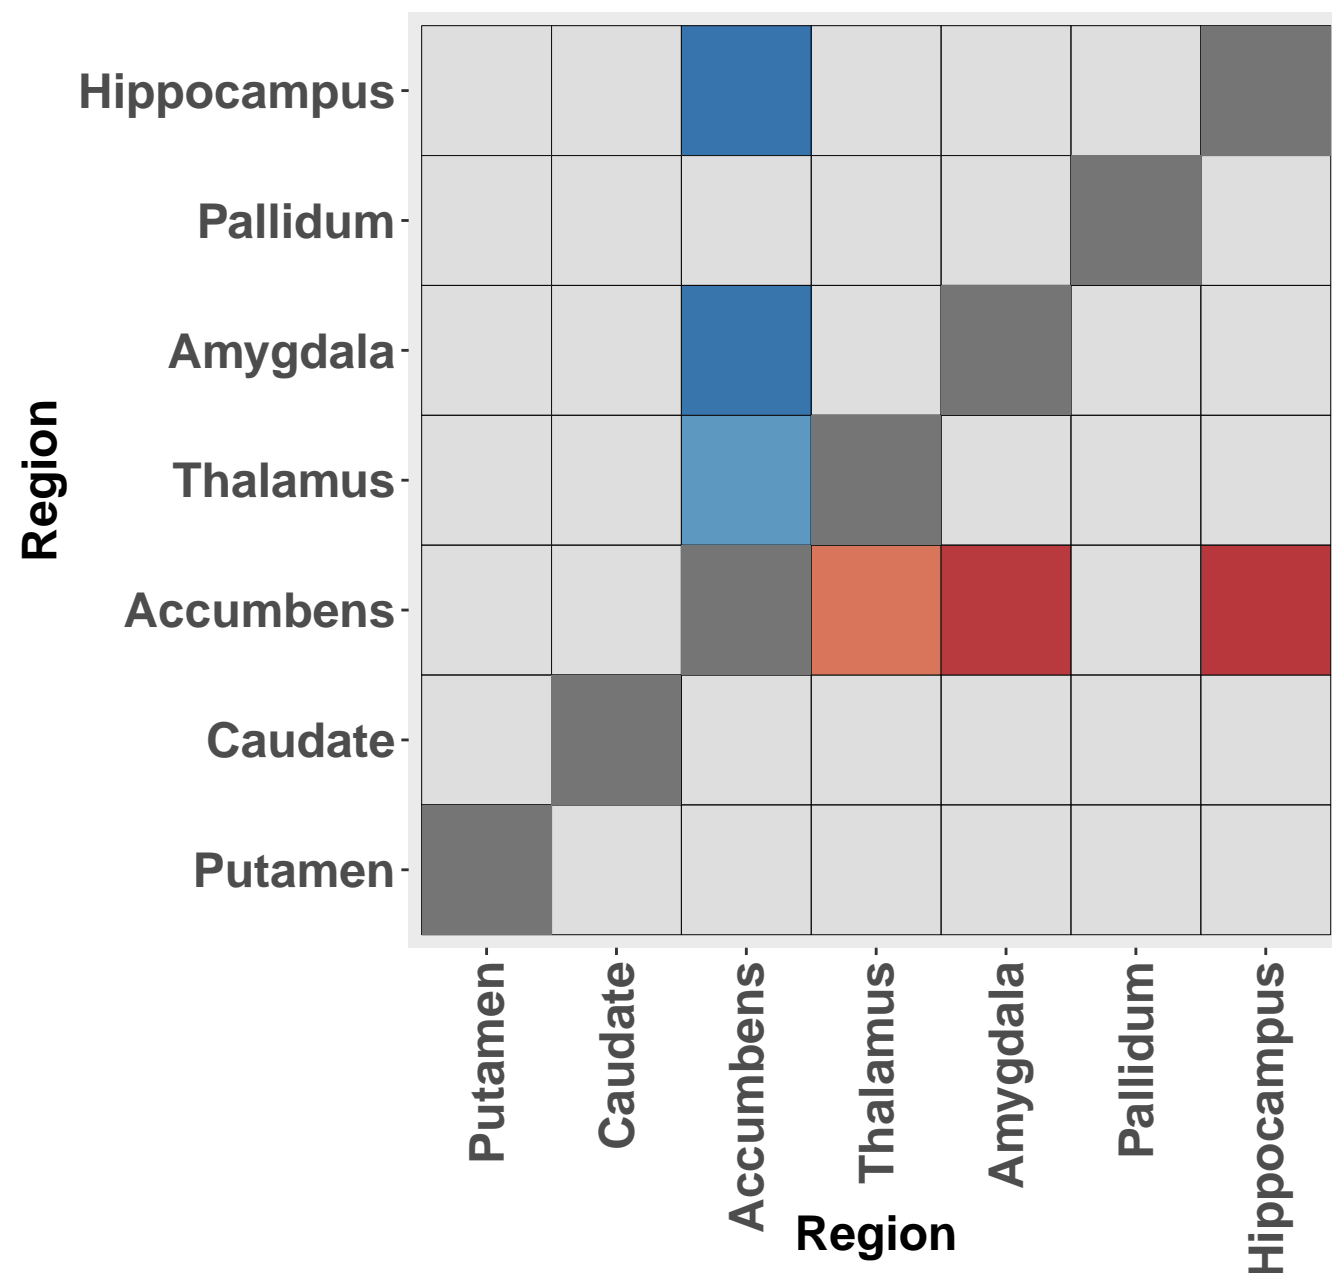

B)

EYO = -15

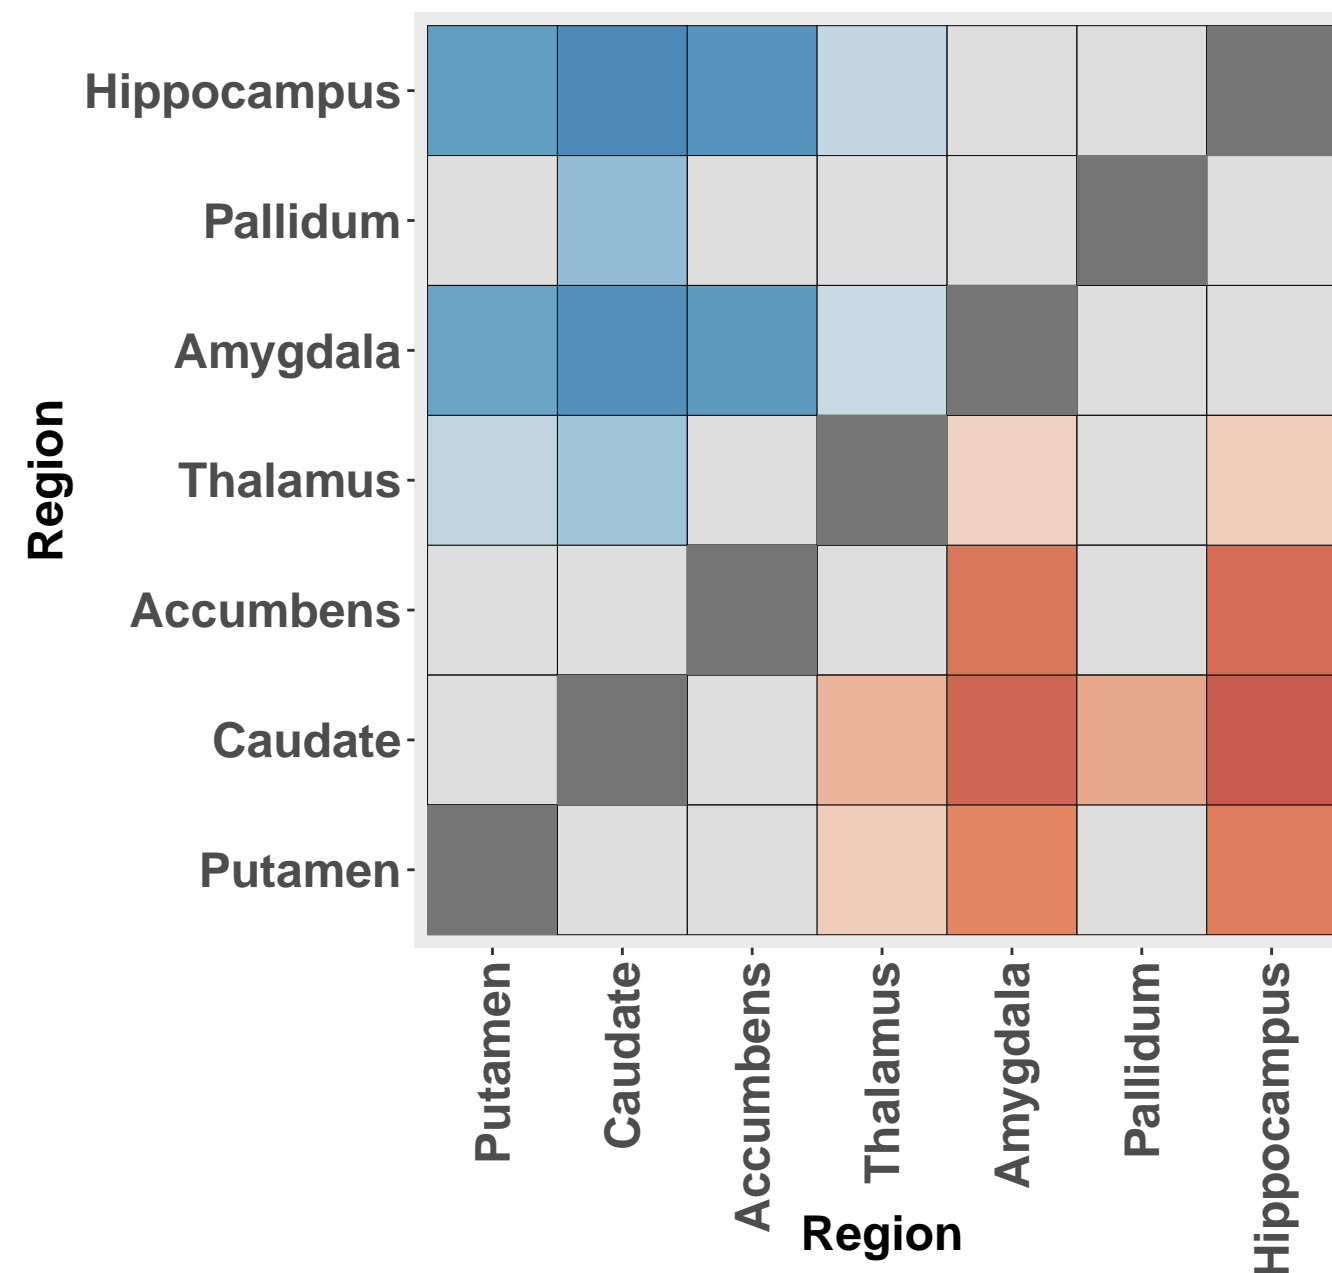

C)

EYO = -5

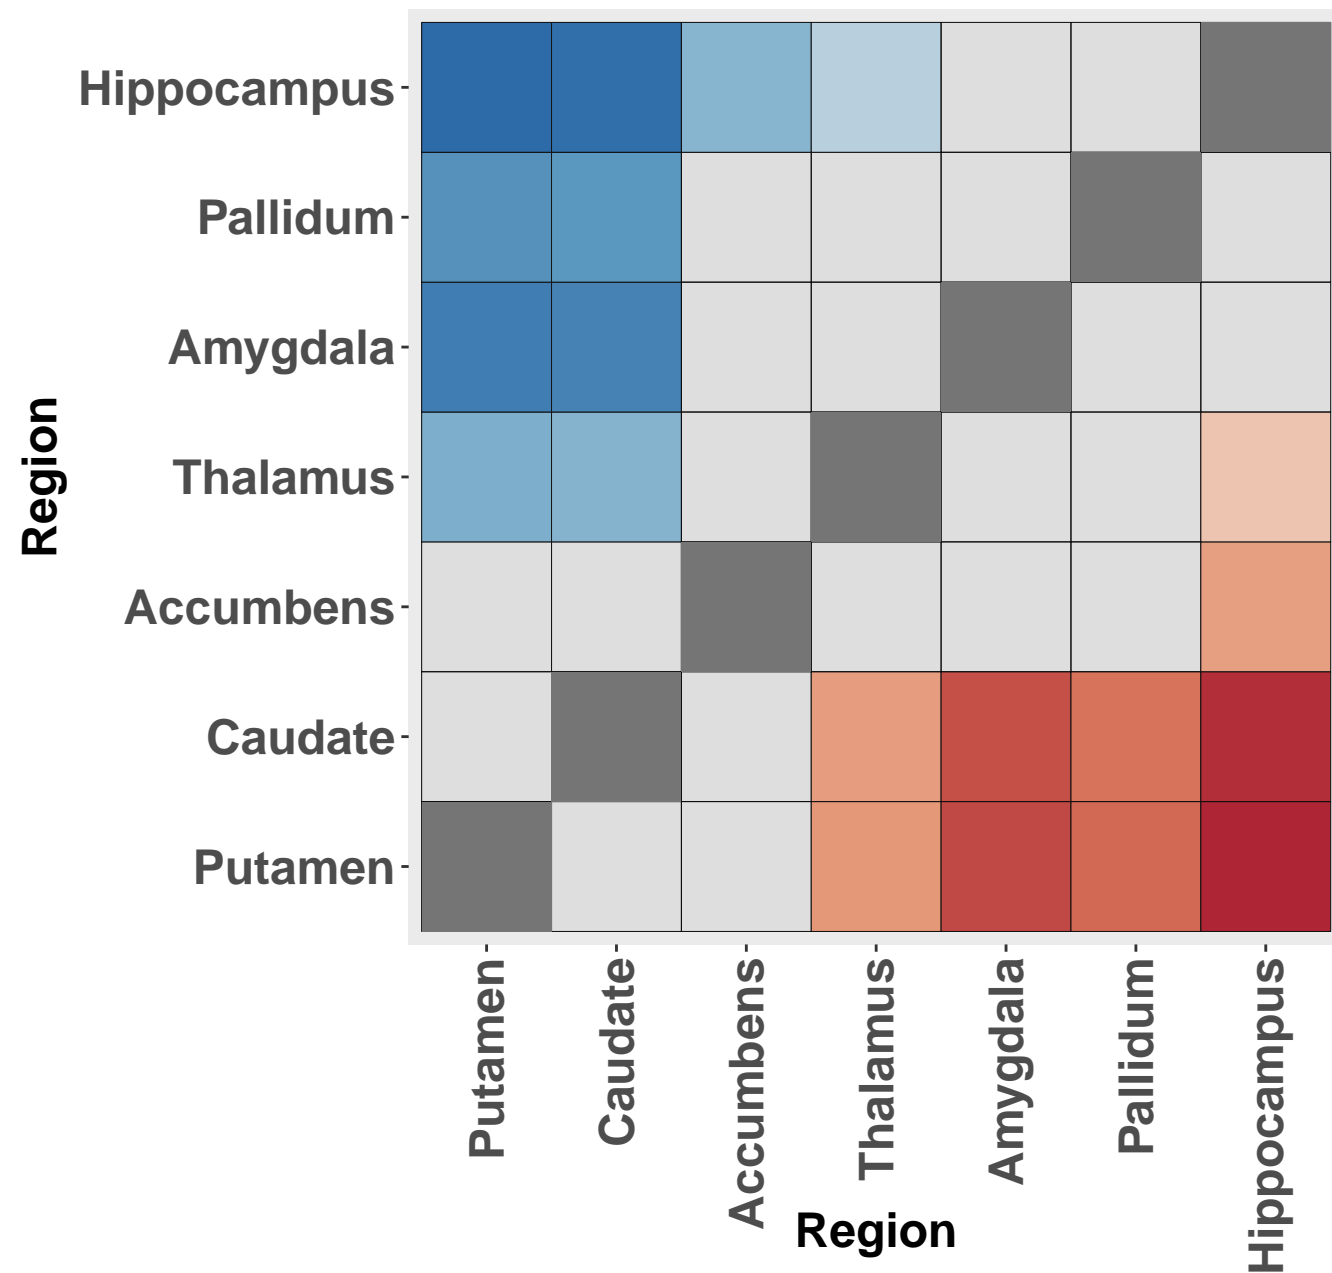

D)

EYO = 5

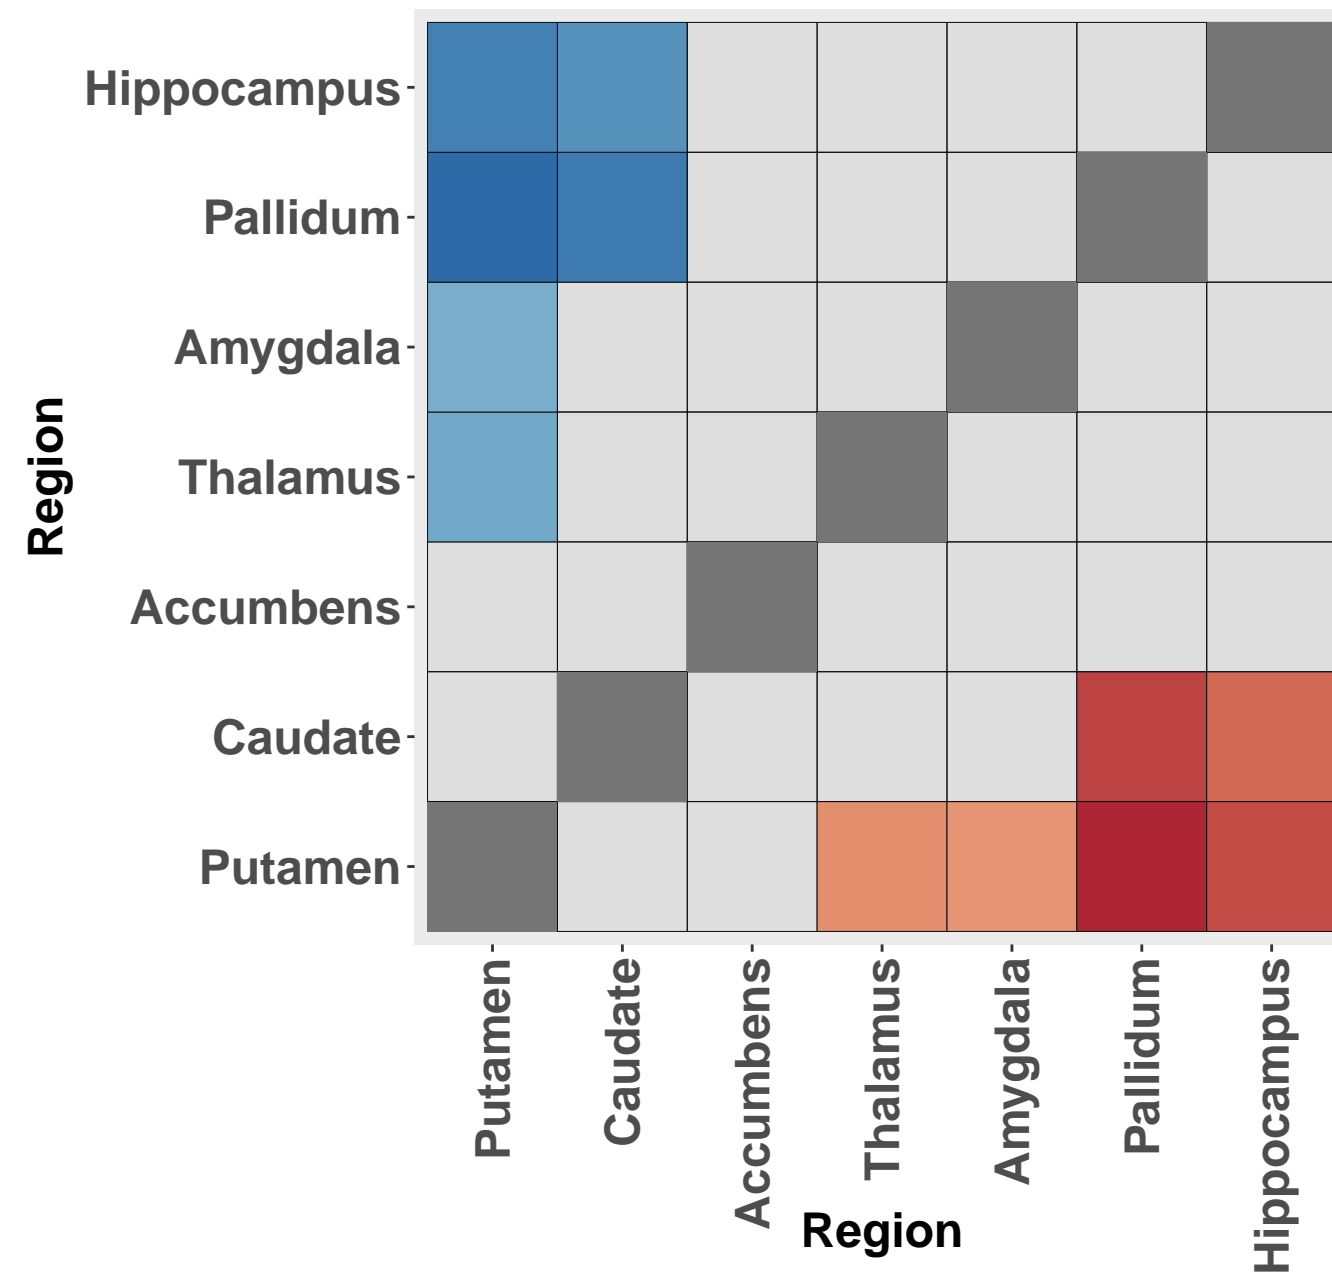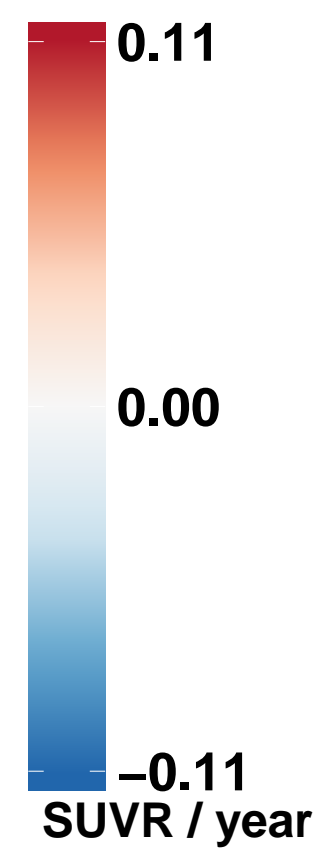

Supplement: NIHMS941123-supplement-4.pdf [file NIHMS941123-supplement-4.pdf]

# Cortical FDG: MC Regional Rate Comparisons

A)

EYO = -25

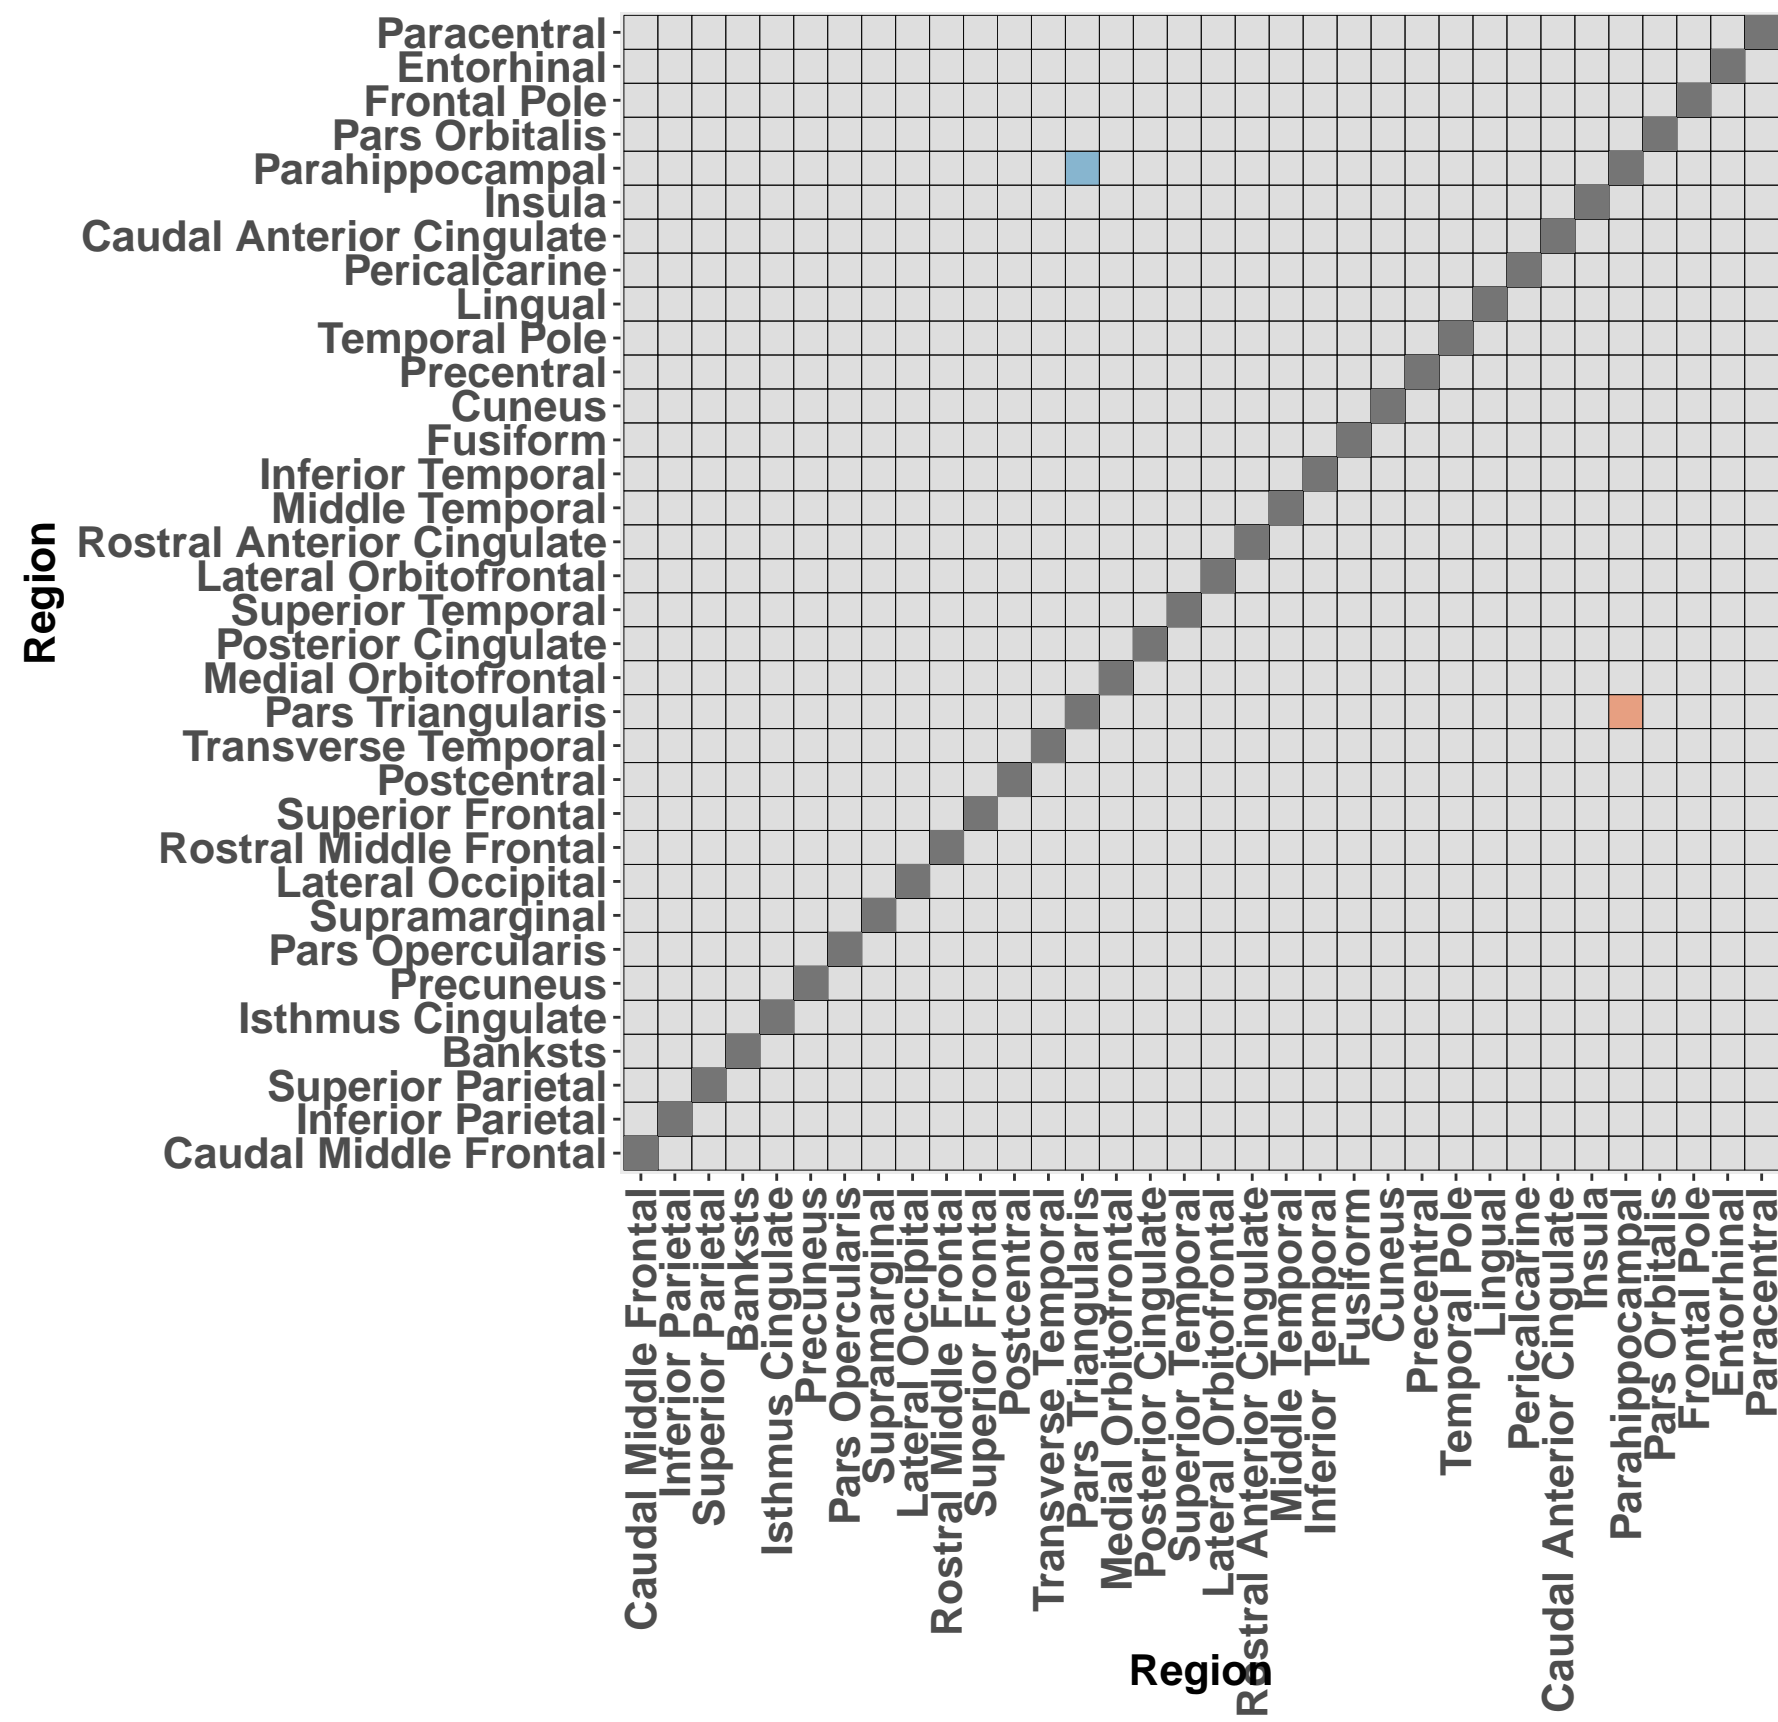

B)

EYO = -15

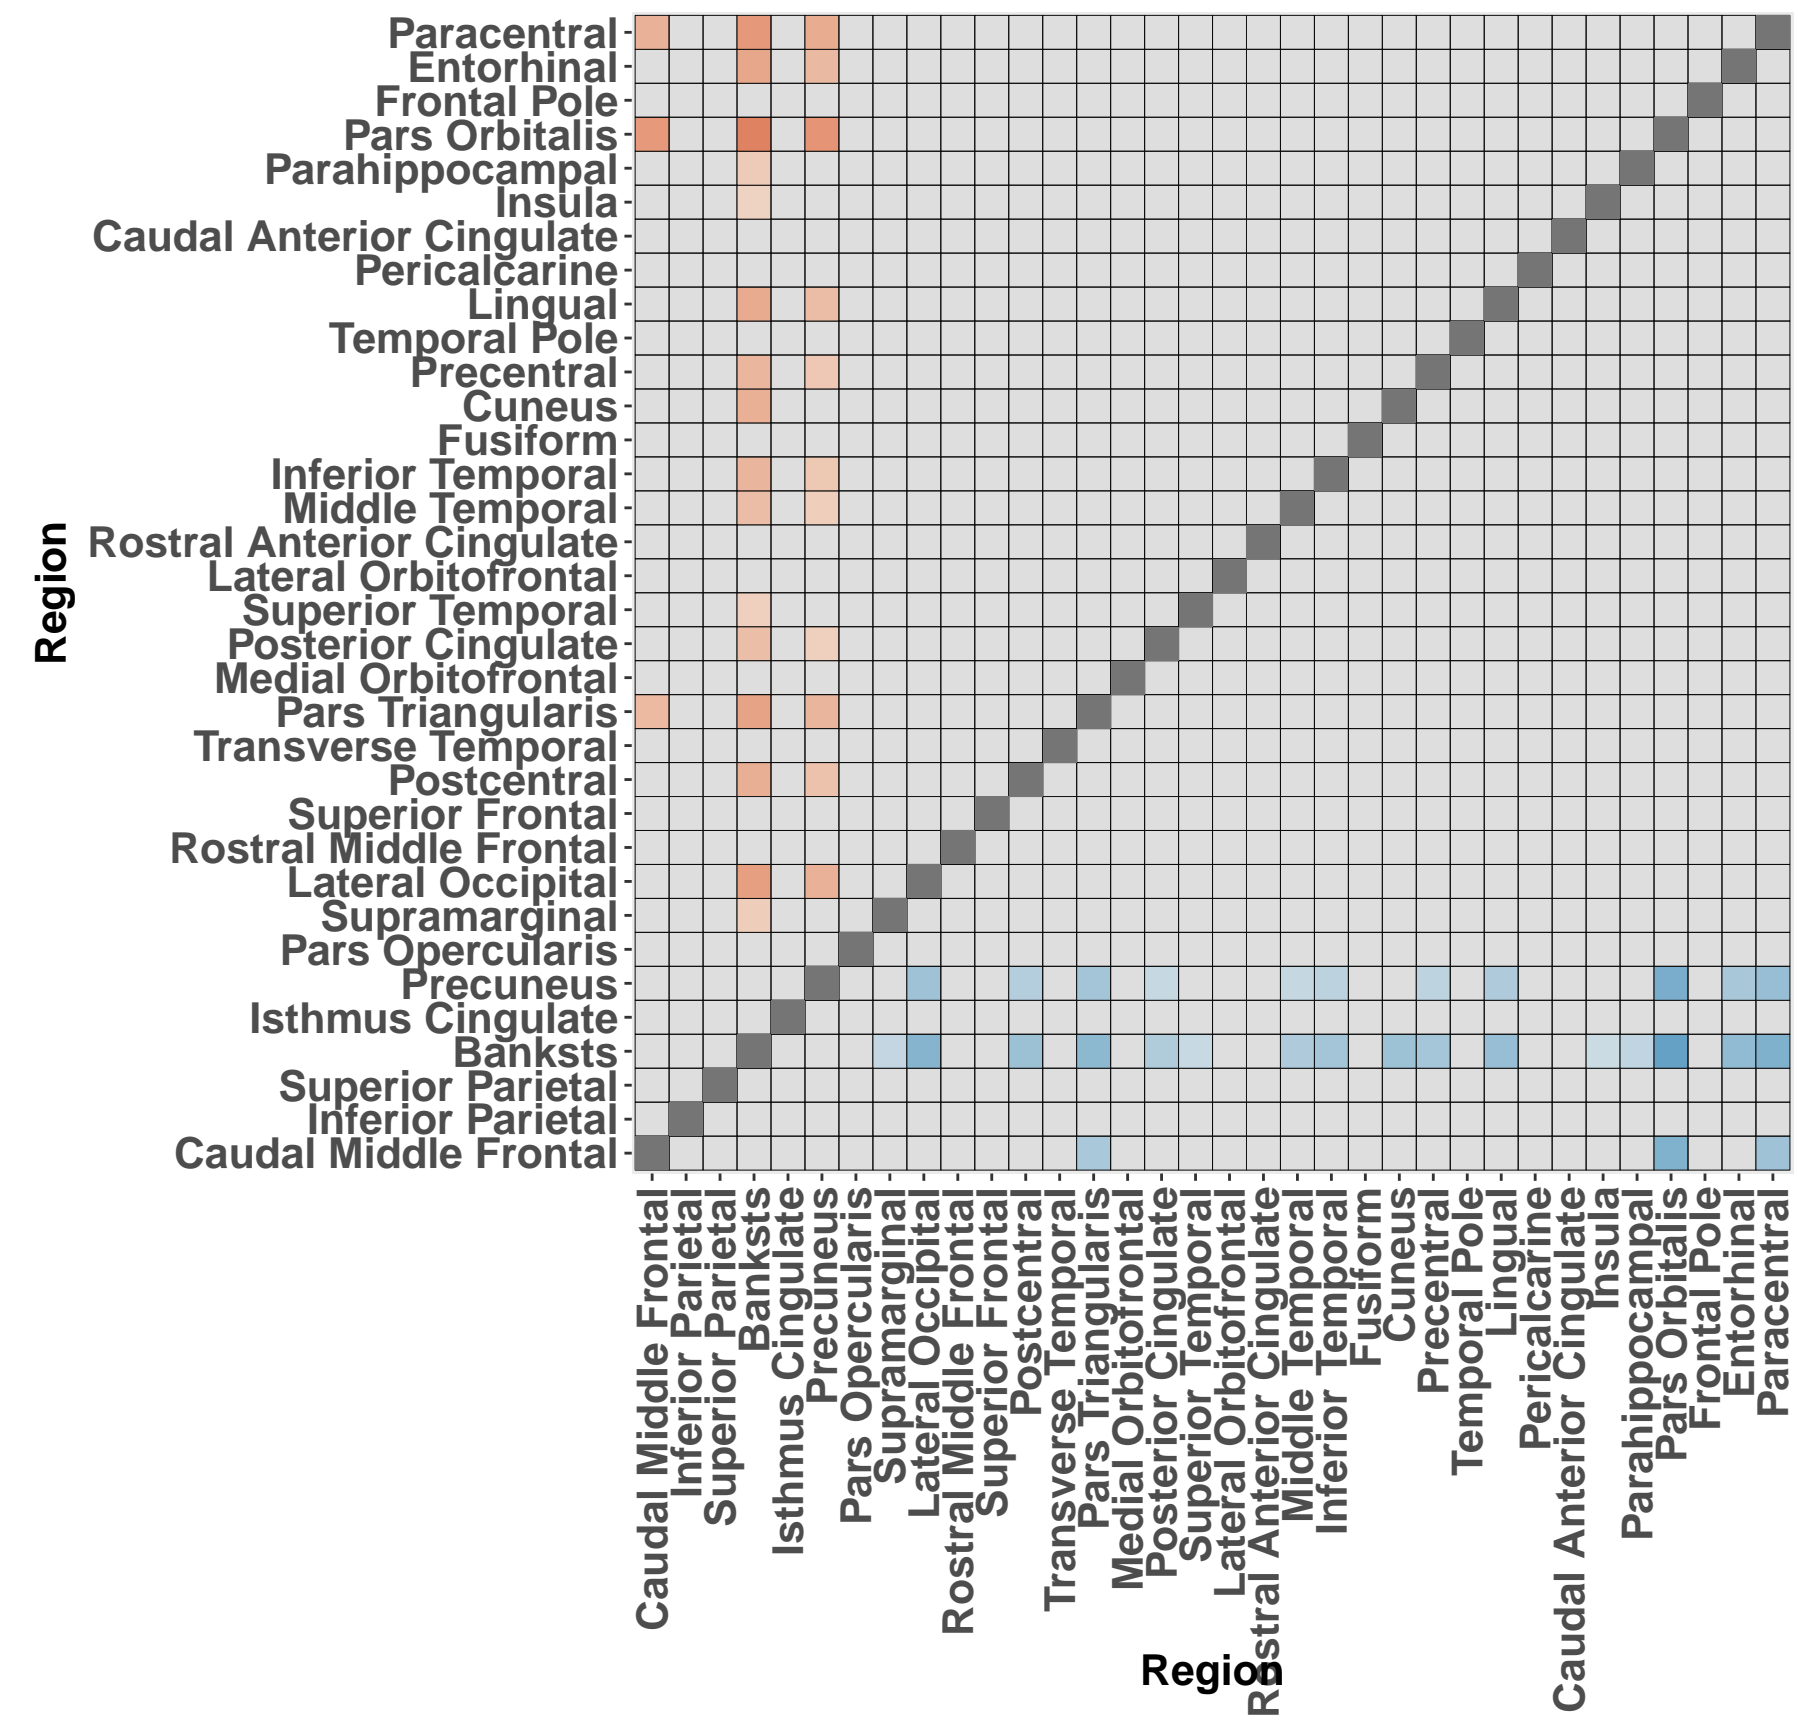

C)

EYO = -5

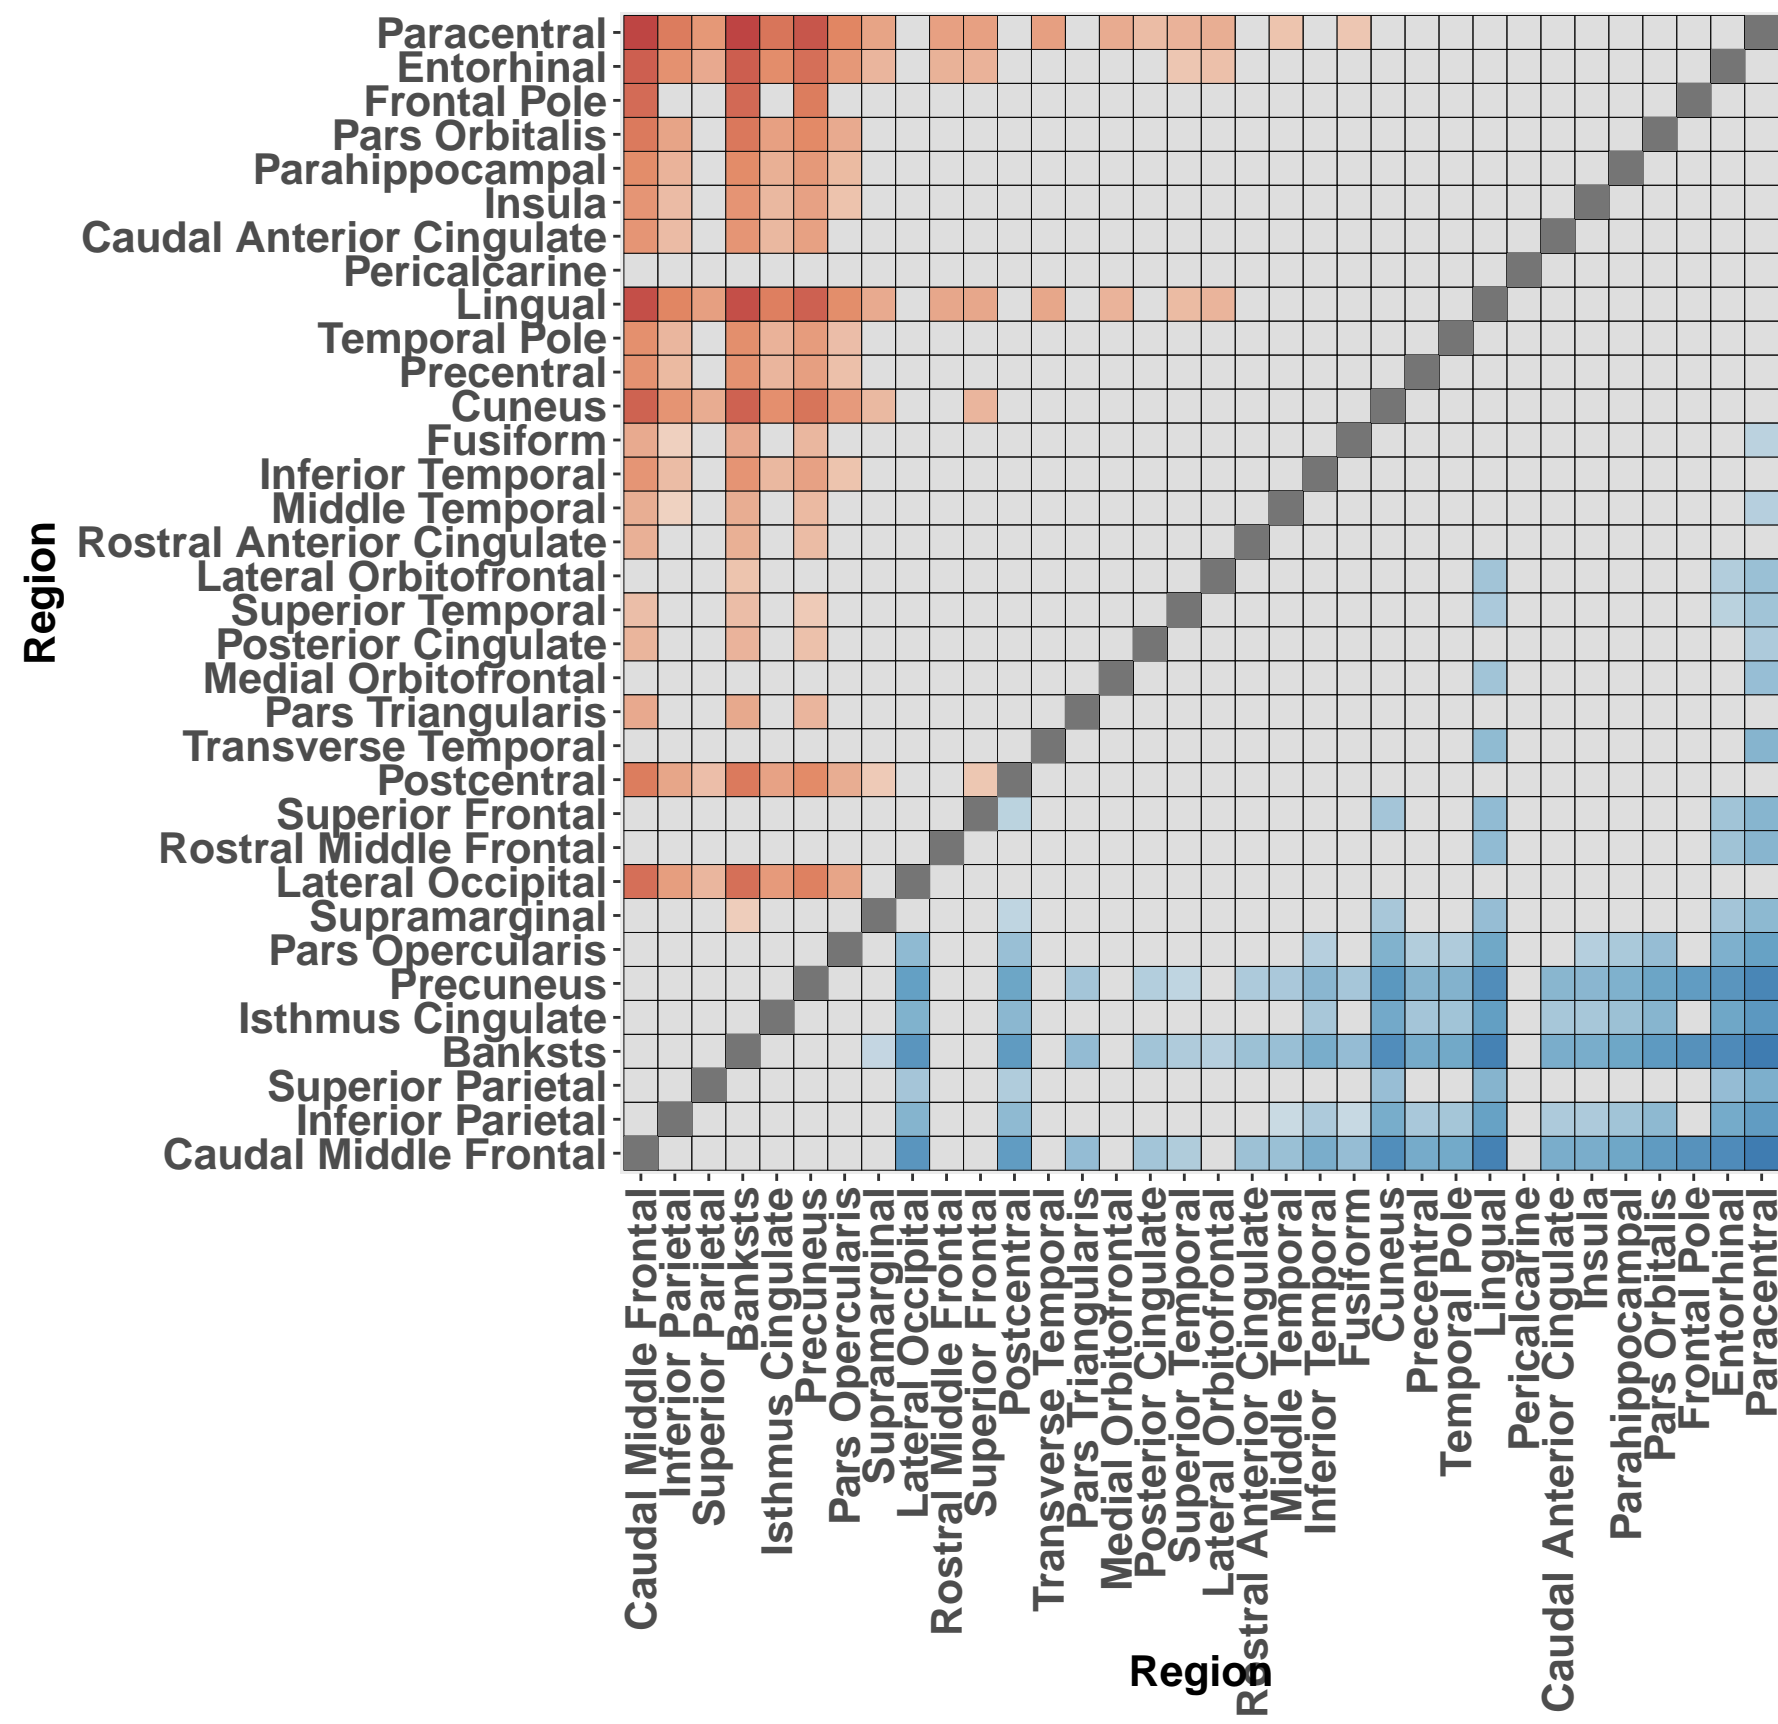

D)

EYO = 5

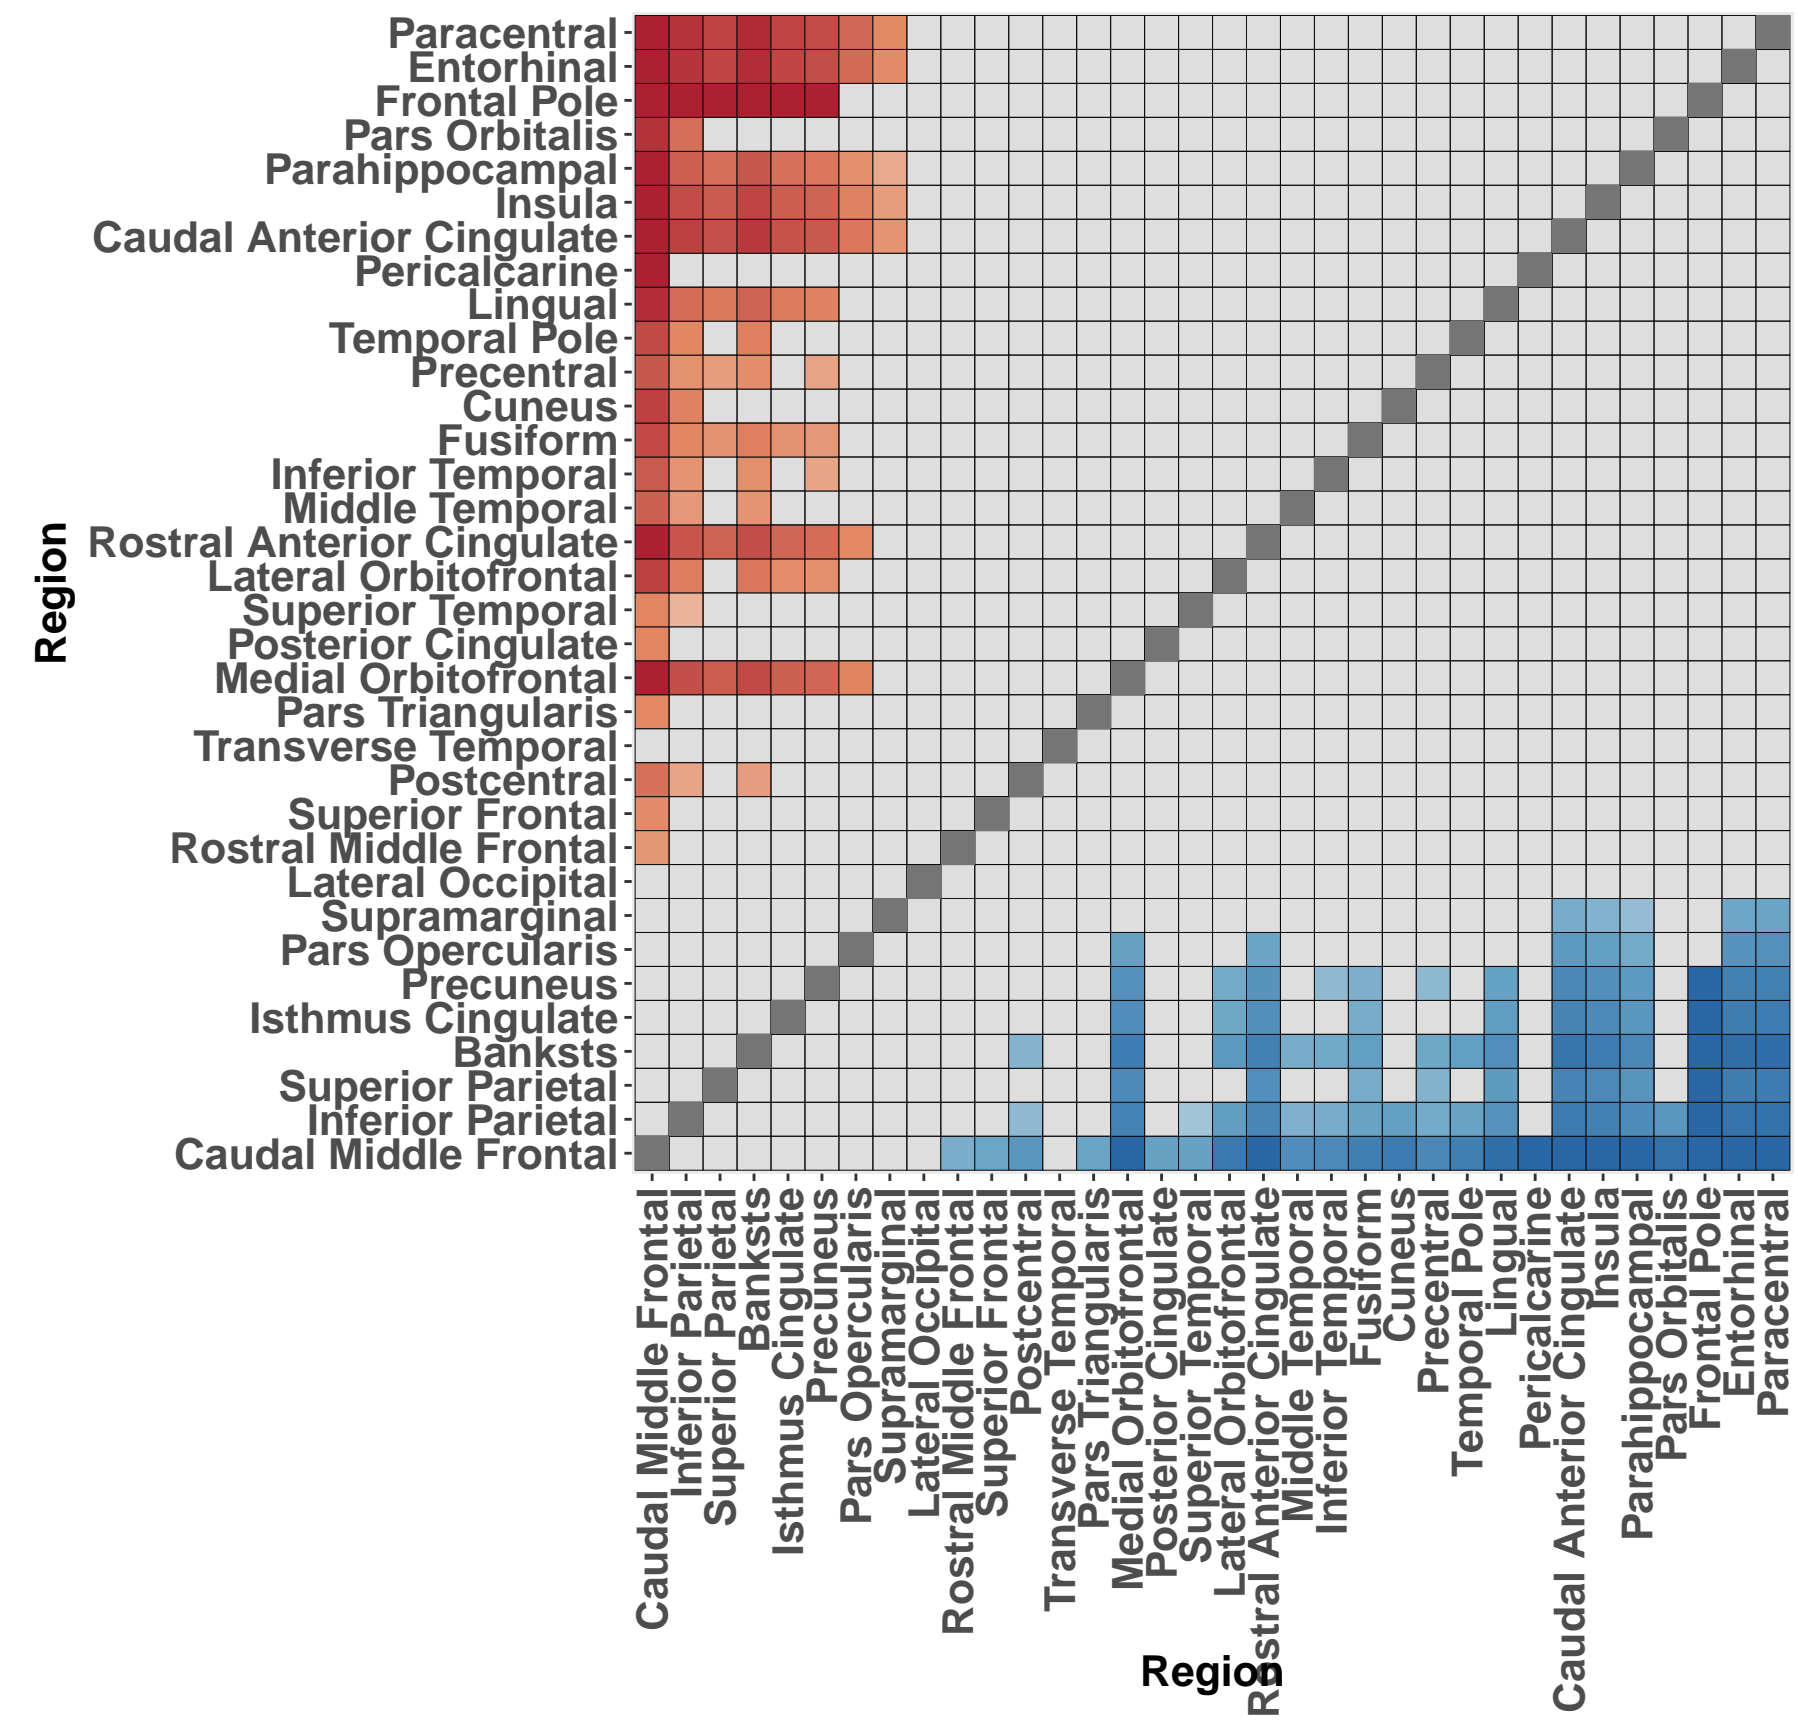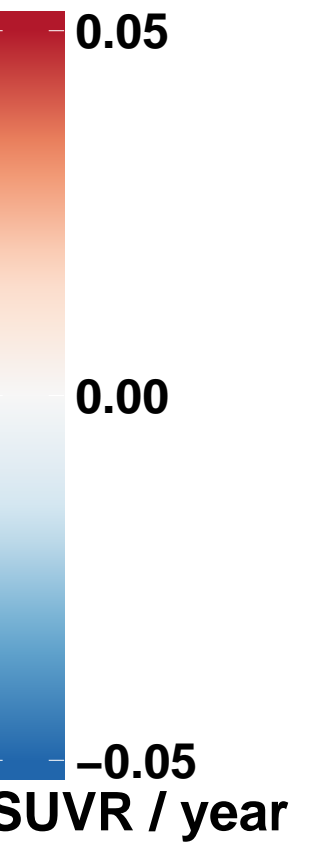

Supplement: NIHMS941123-supplement-5.pdf [file NIHMS941123-supplement-5.pdf]

# Subcortical FDG: MC Regional Rate Comparisons

A)

EYO = -25

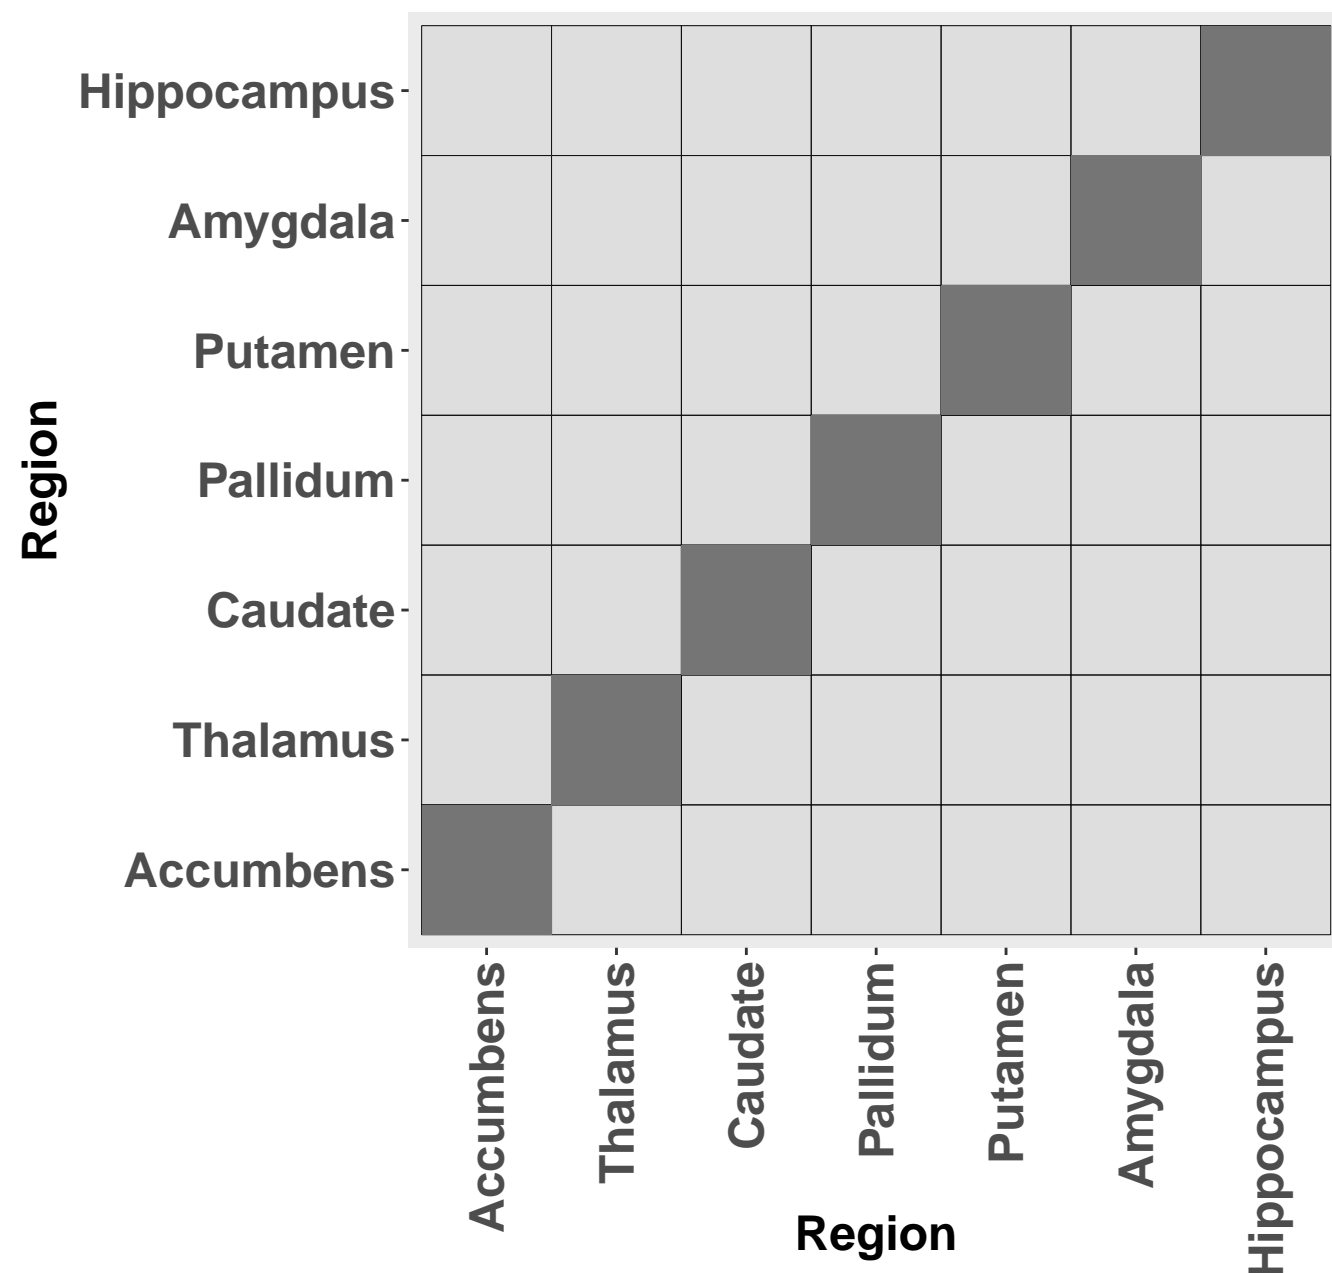

B)

EYO = -15

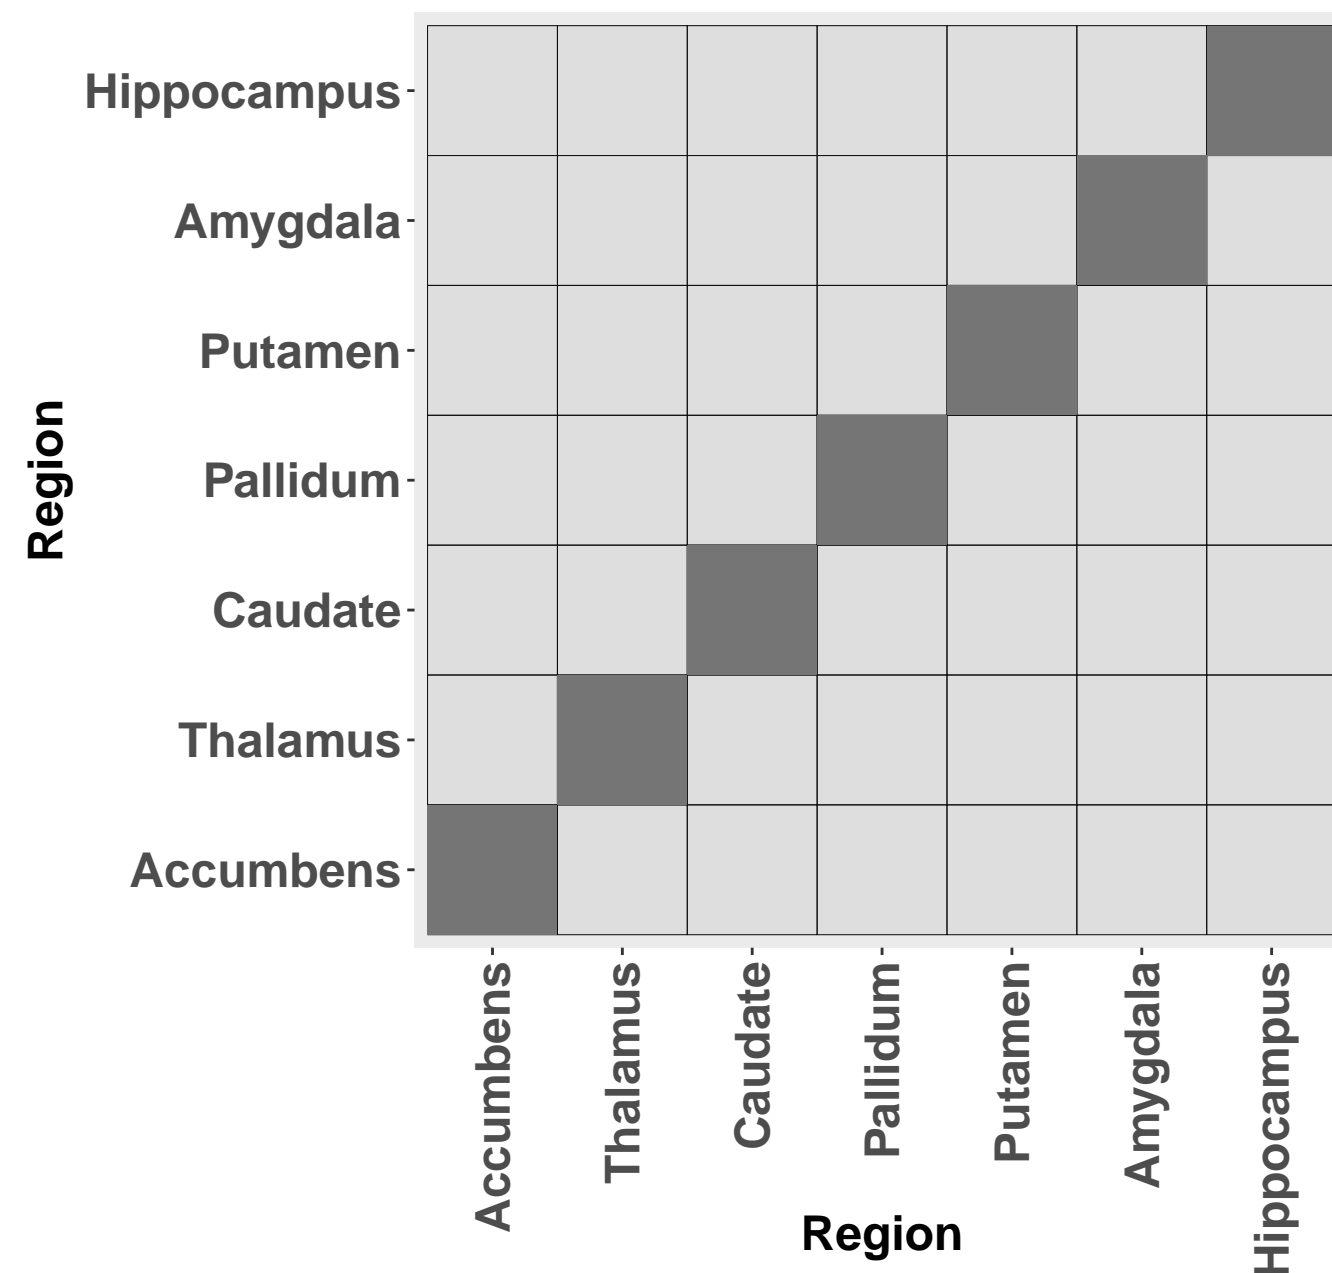

C)

EYO = -5

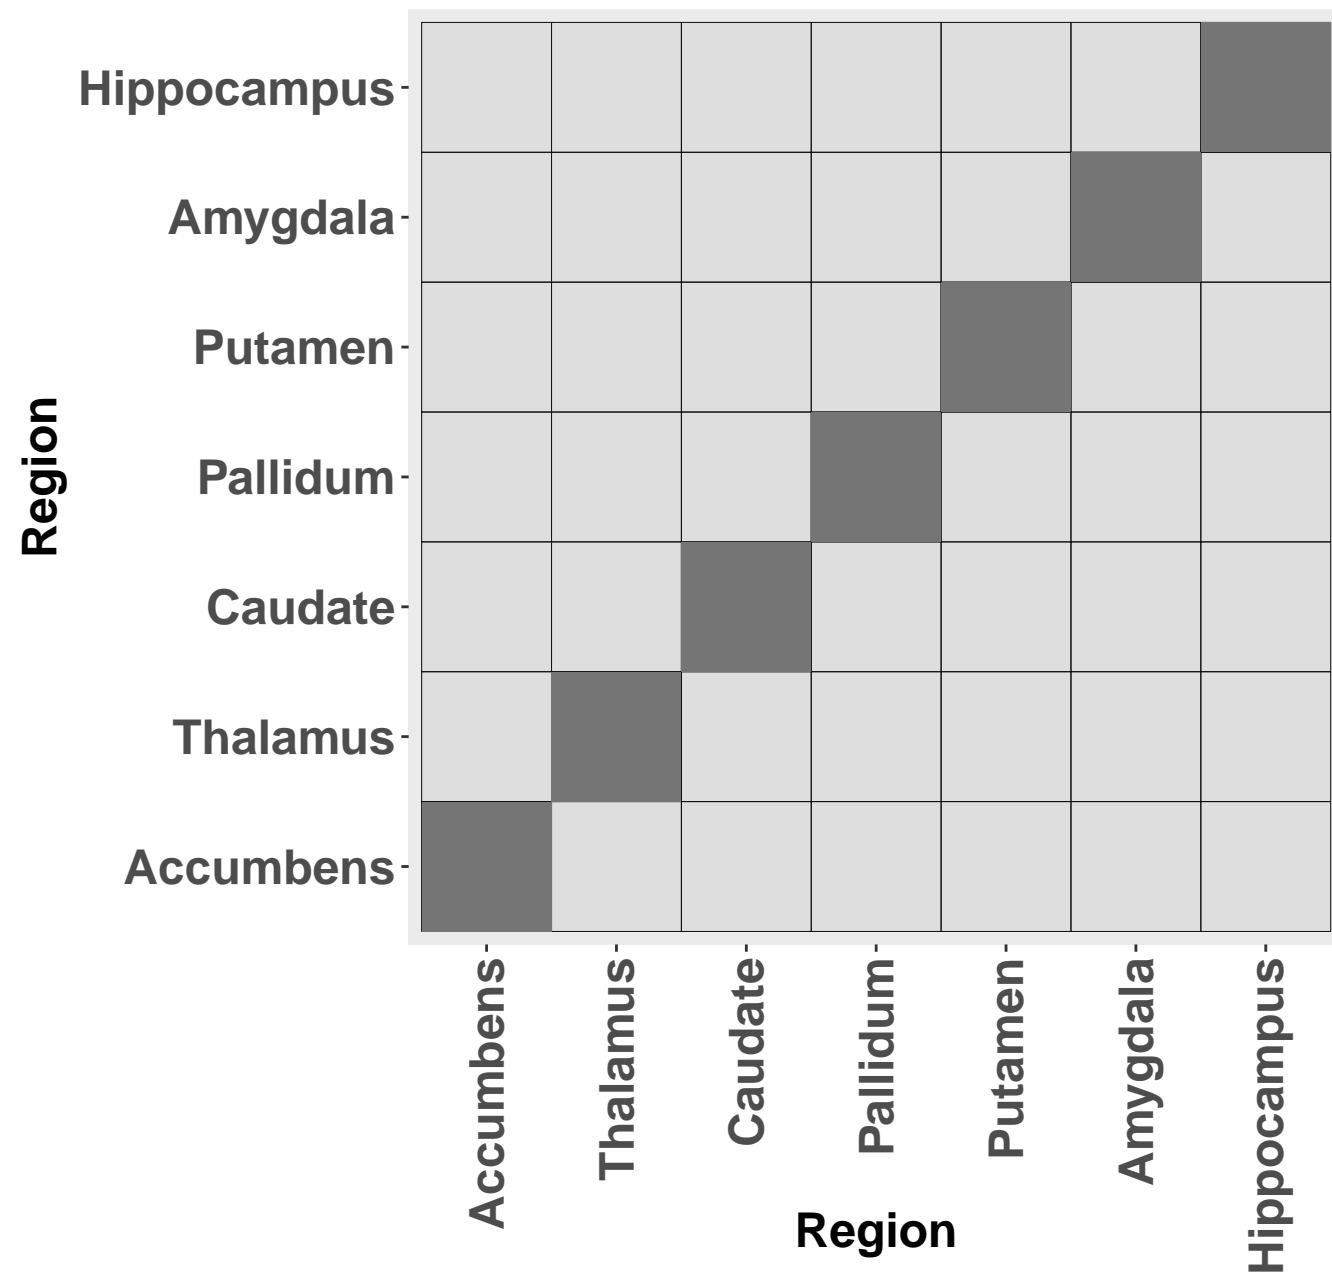

D)

EYO = 5

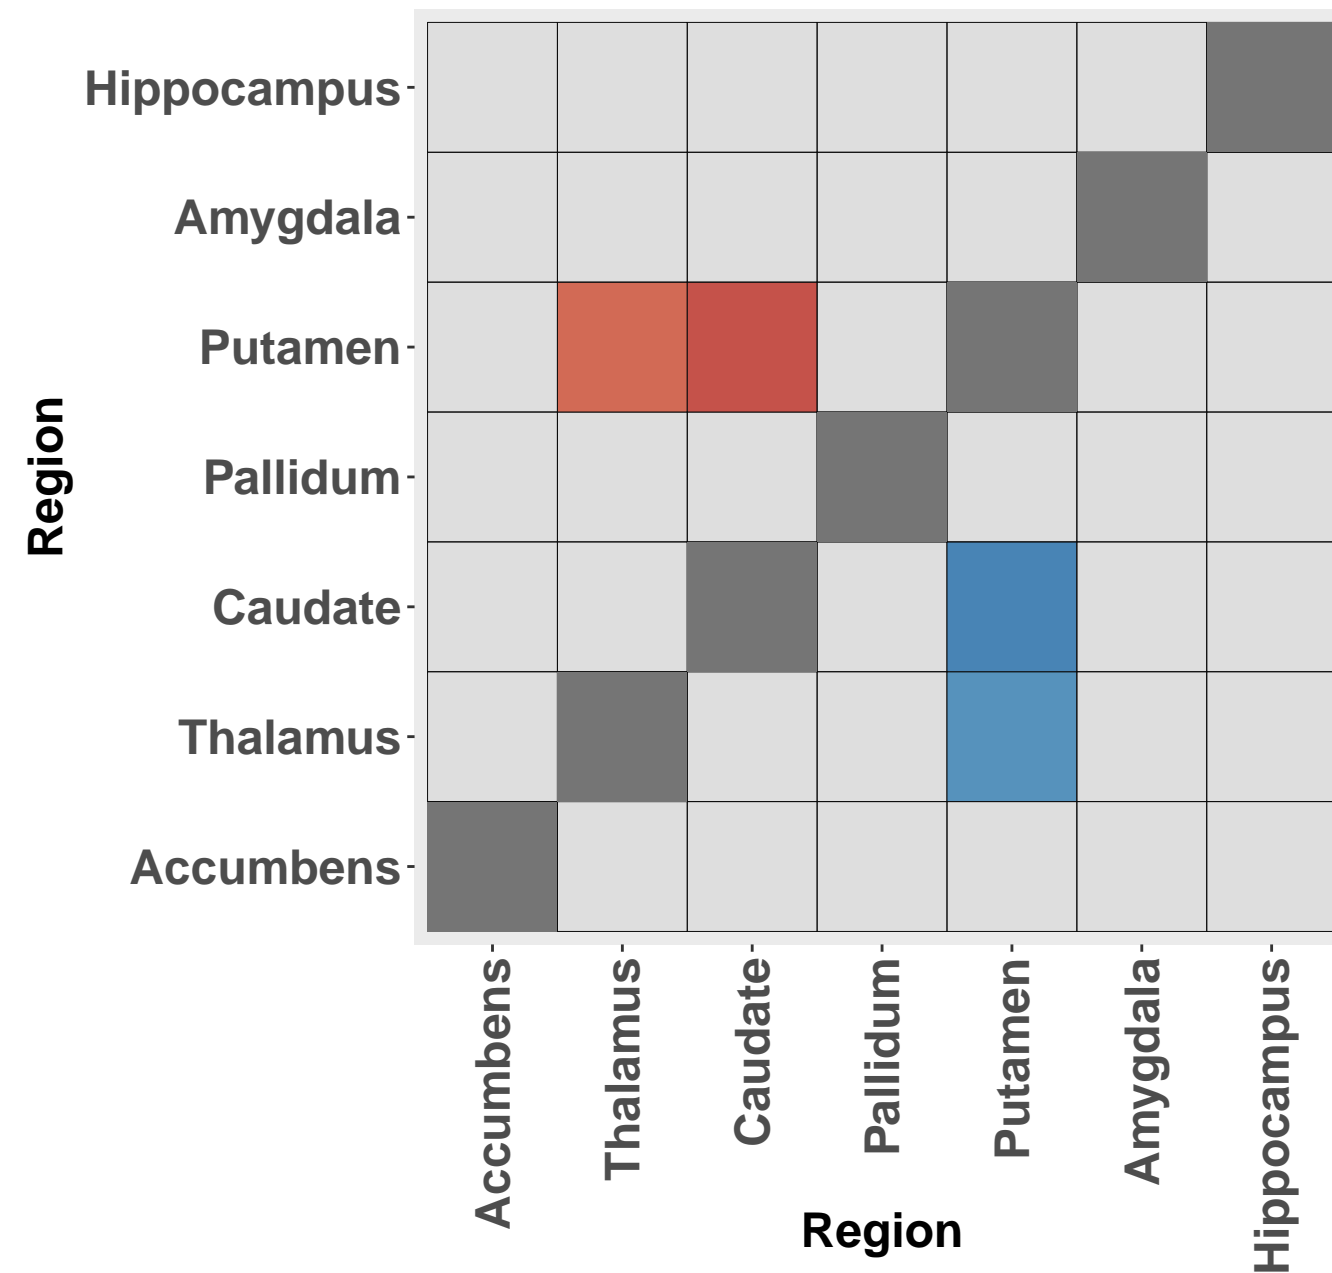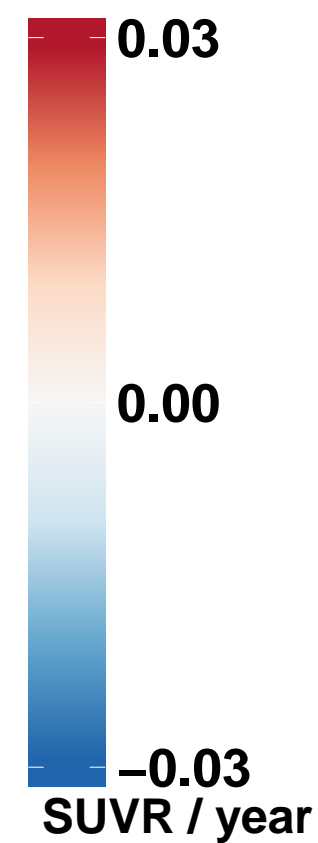

Supplement: NIHMS941123-supplement-6.pdf [file NIHMS941123-supplement-6.pdf]

# Cortical Thickness: MC Regional Rate Comparisons

A)

EYO = -25

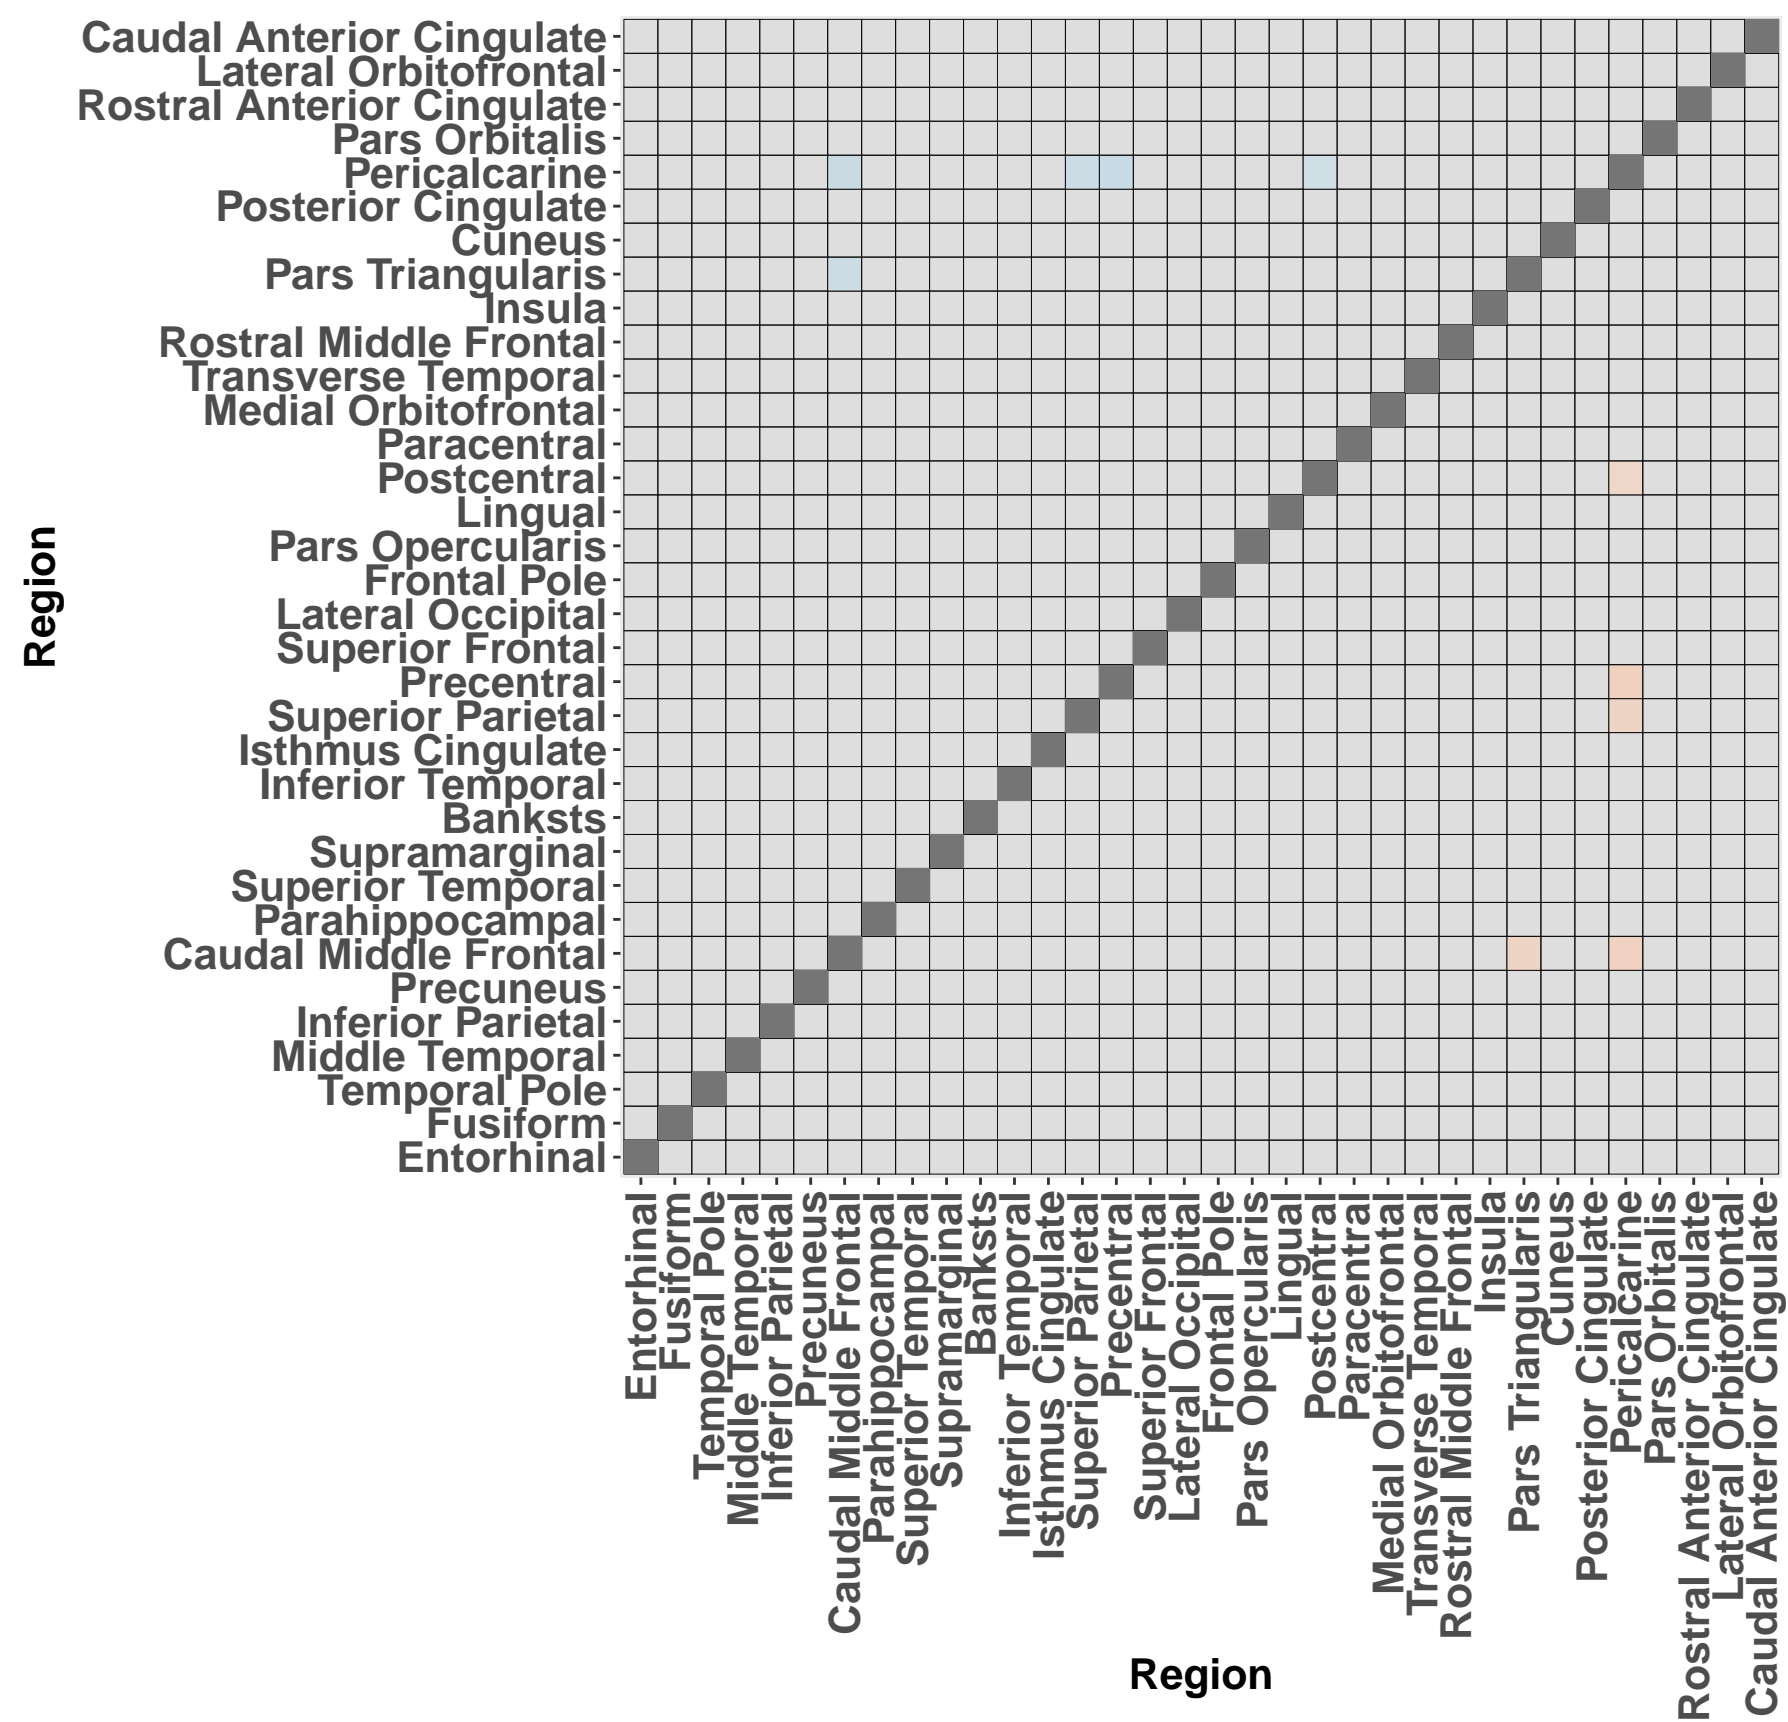

B)

EYO = -15

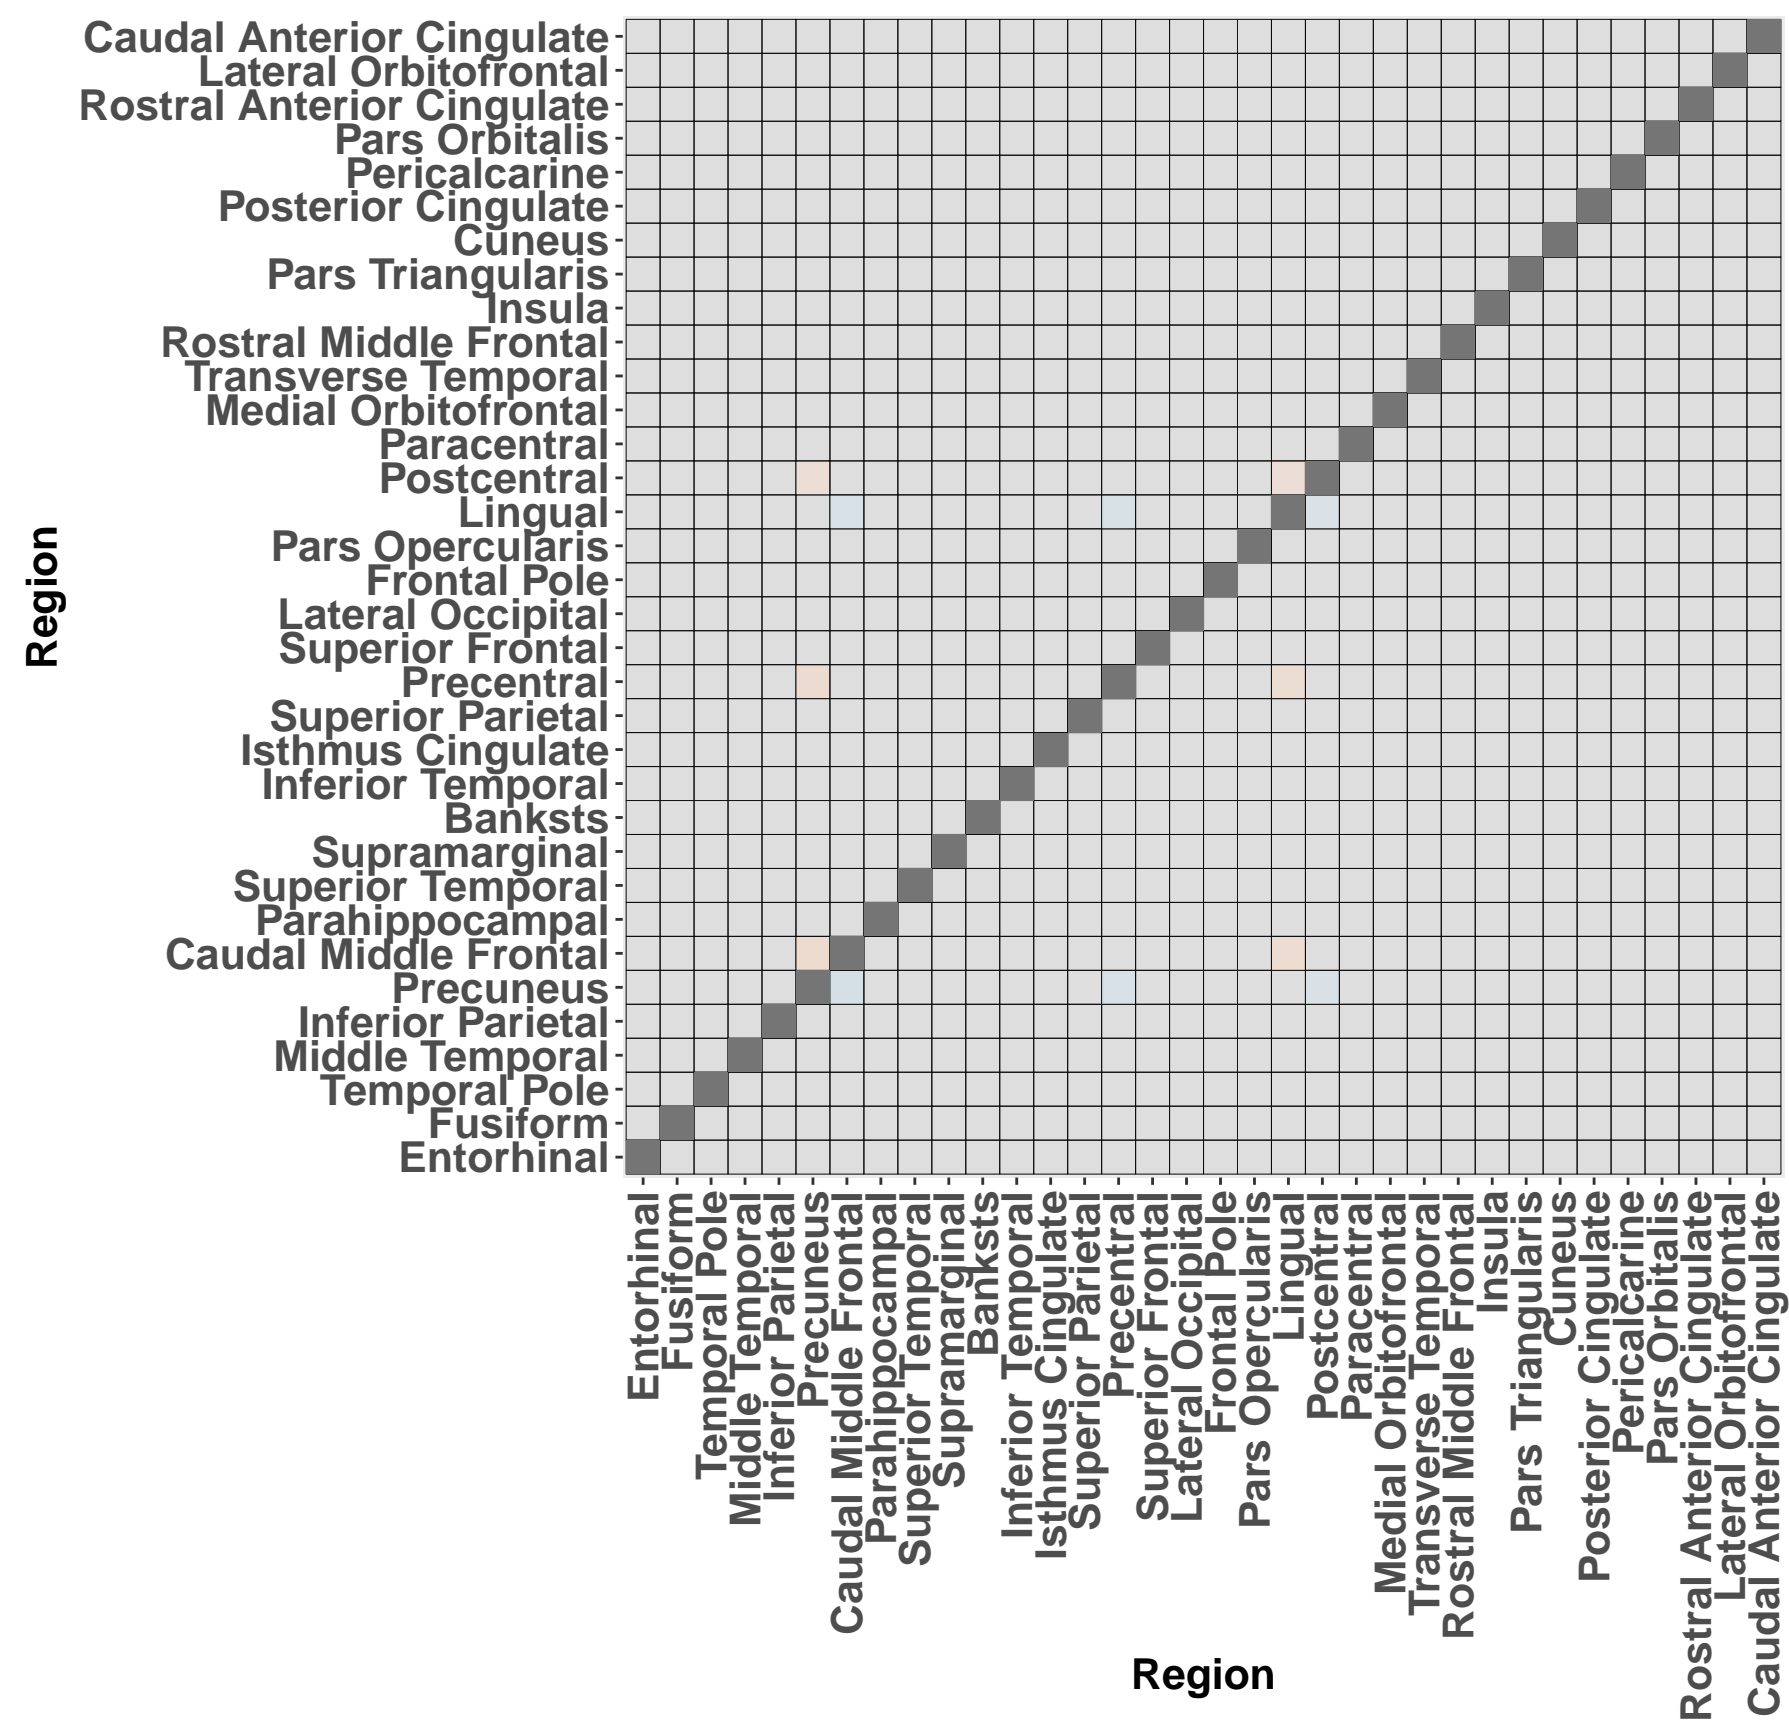

C)

EYO = -5

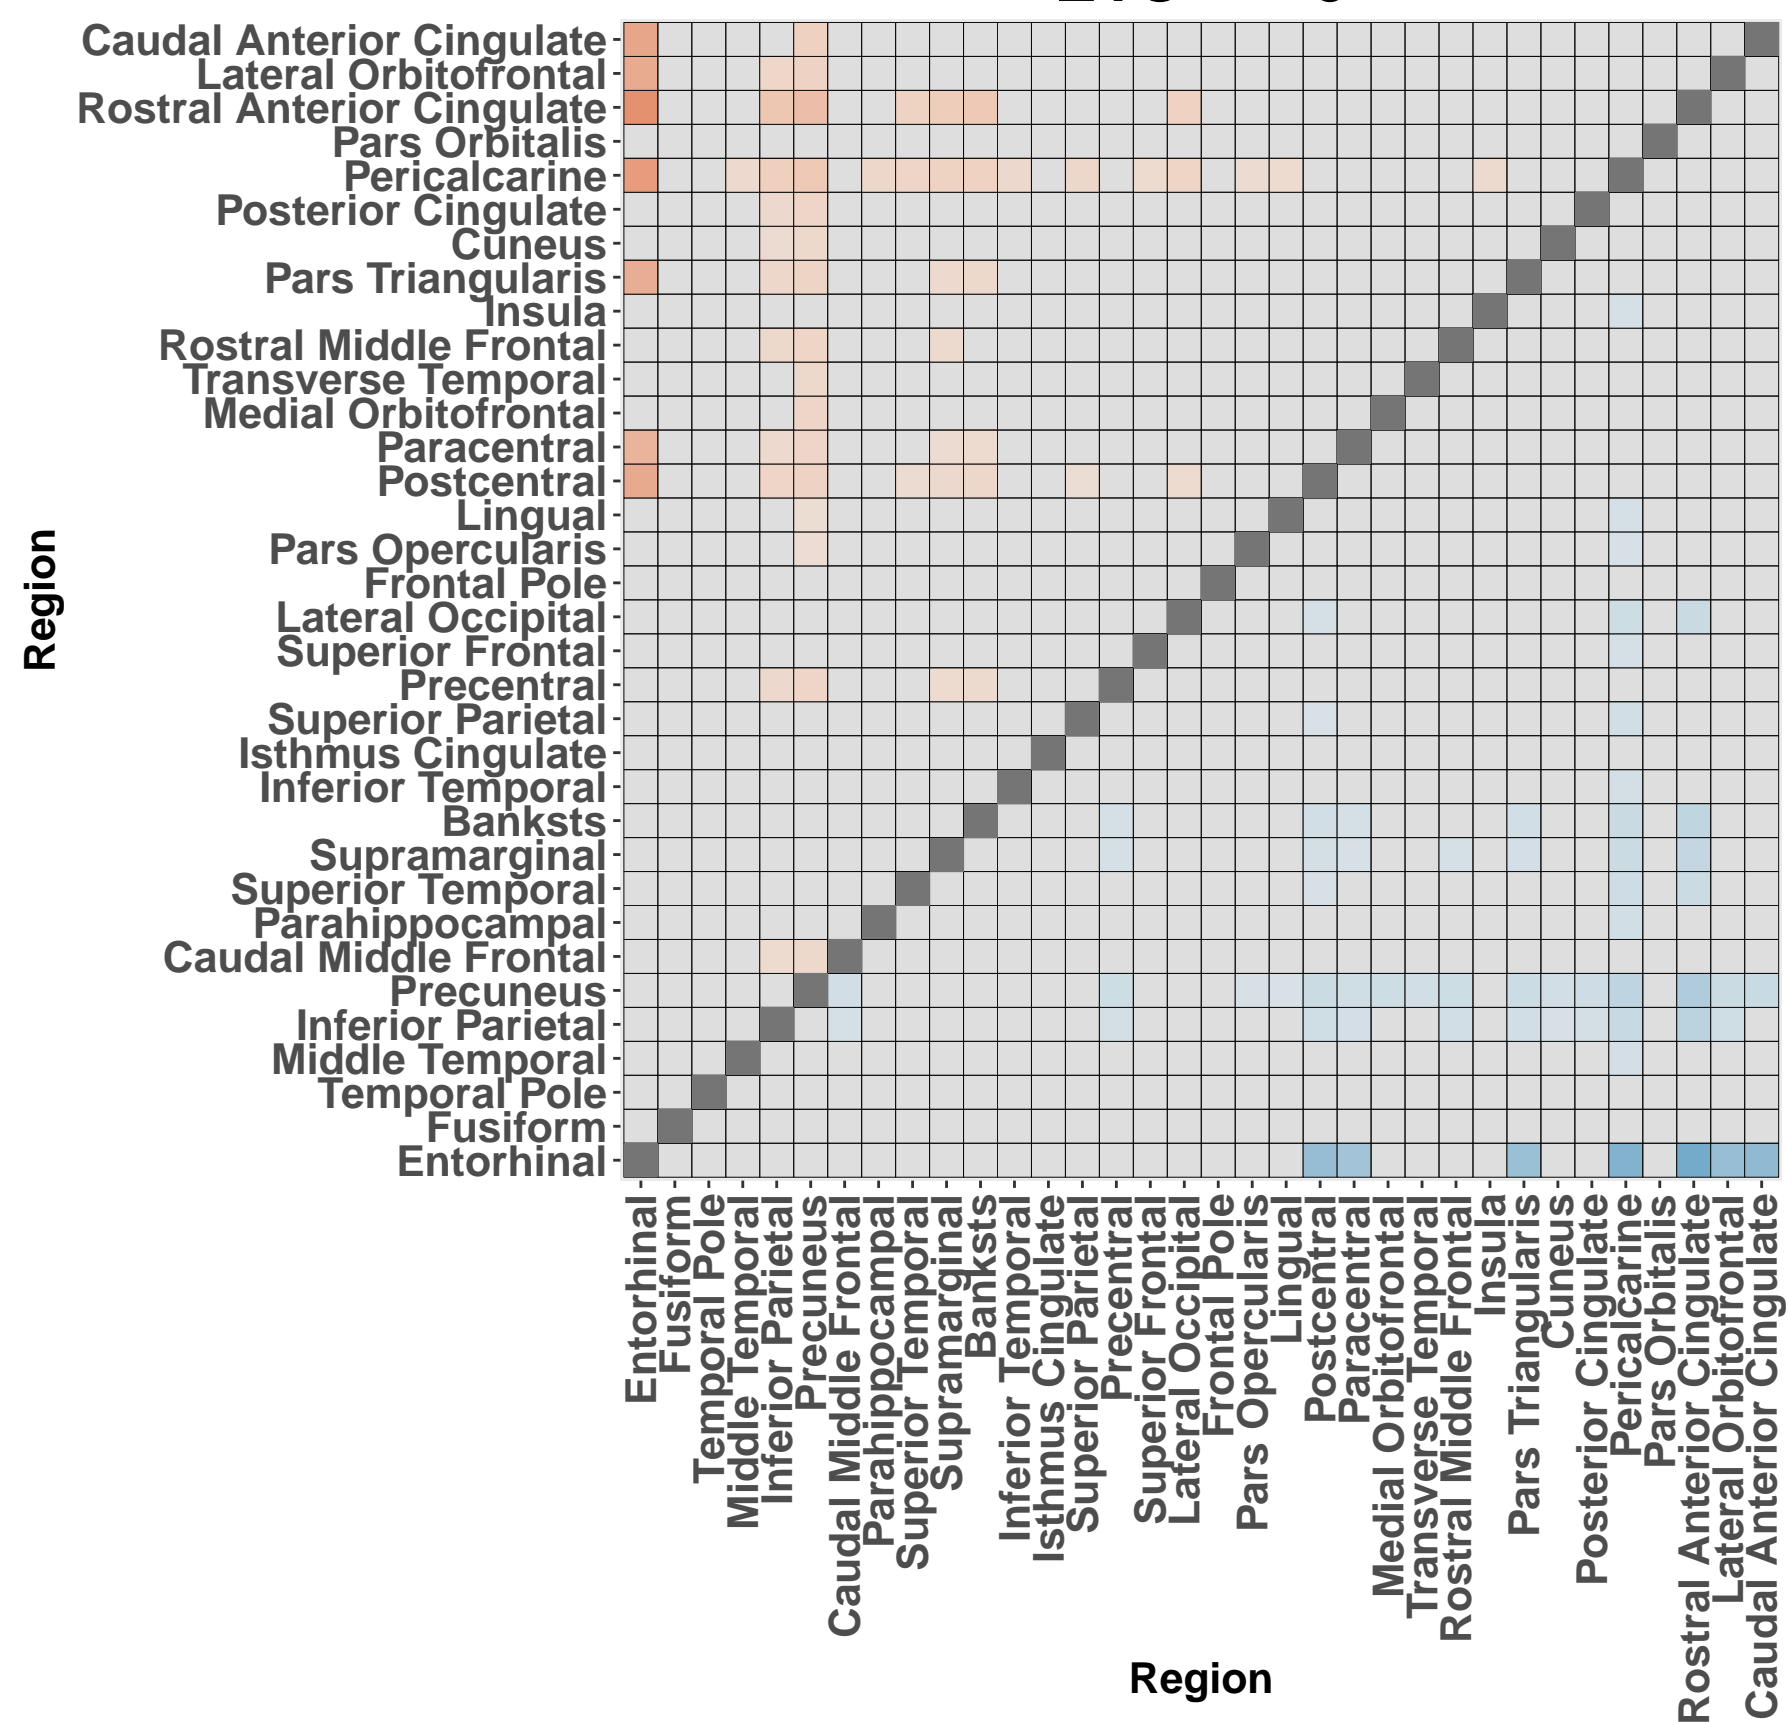

D)

EYO = 5

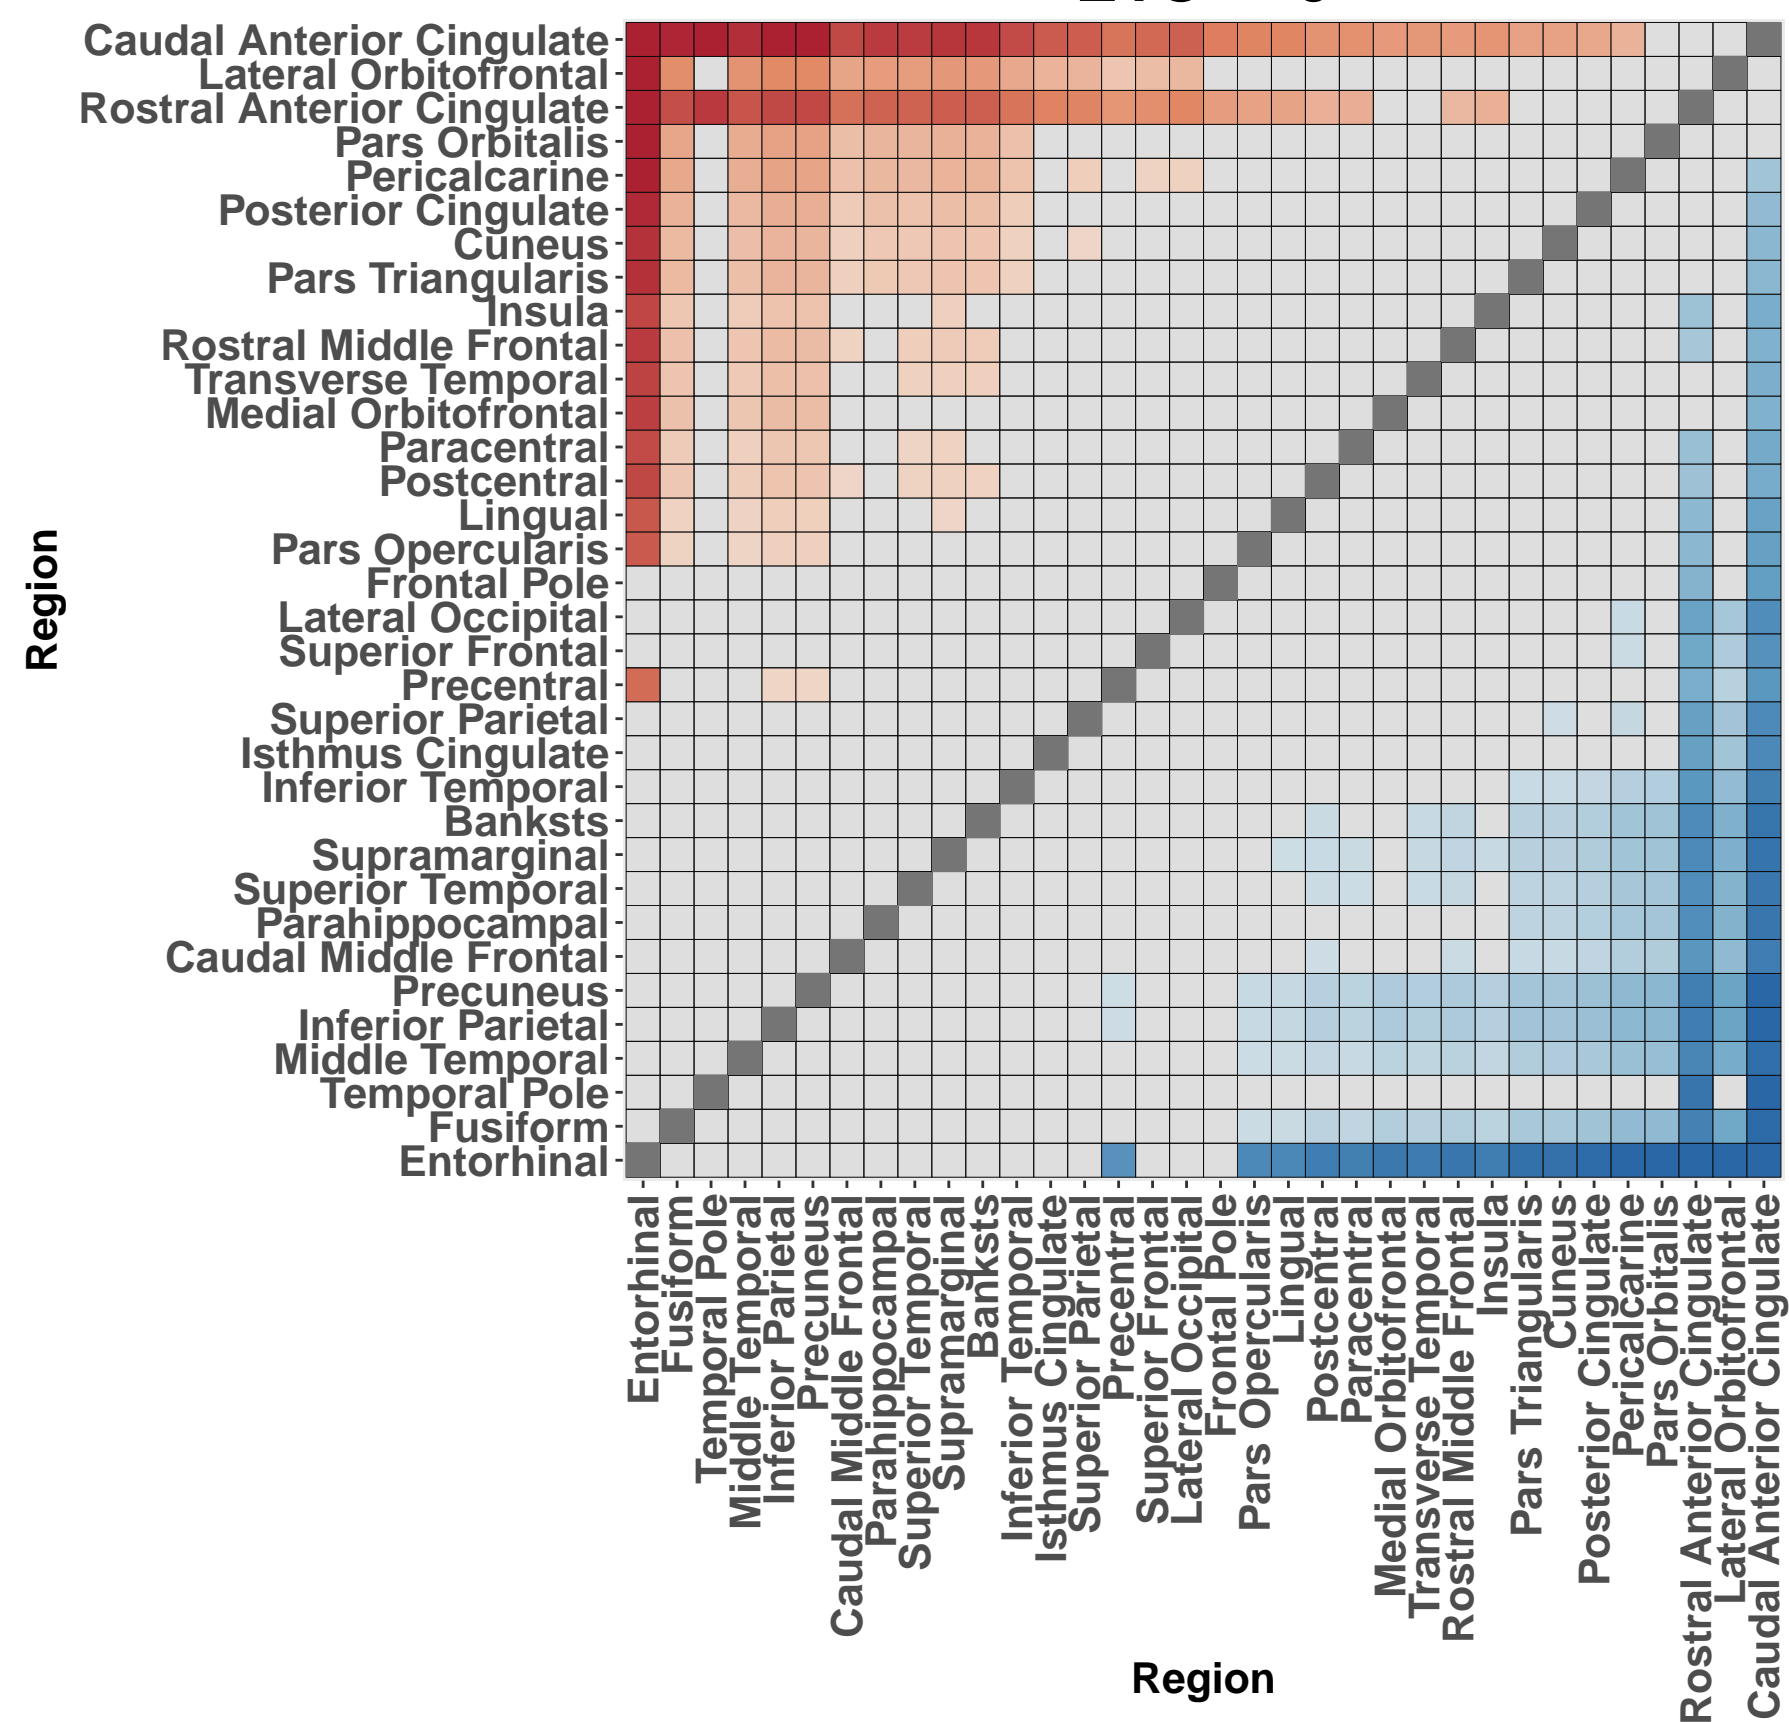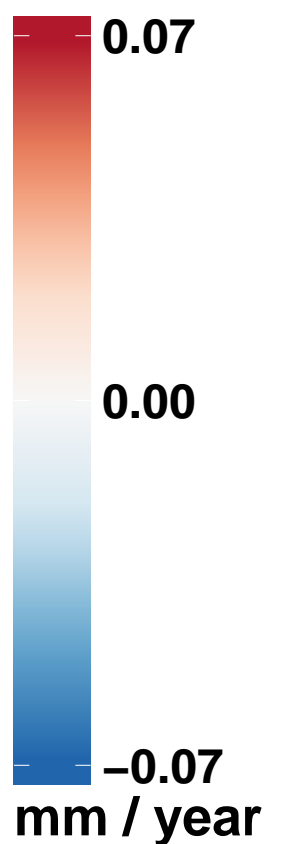

Supplement: NIHMS941123-supplement-7.pdf [file NIHMS941123-supplement-7.pdf]

# Subcortical Volume: MC Regional Rate Comparisons

A)

EYO = -25

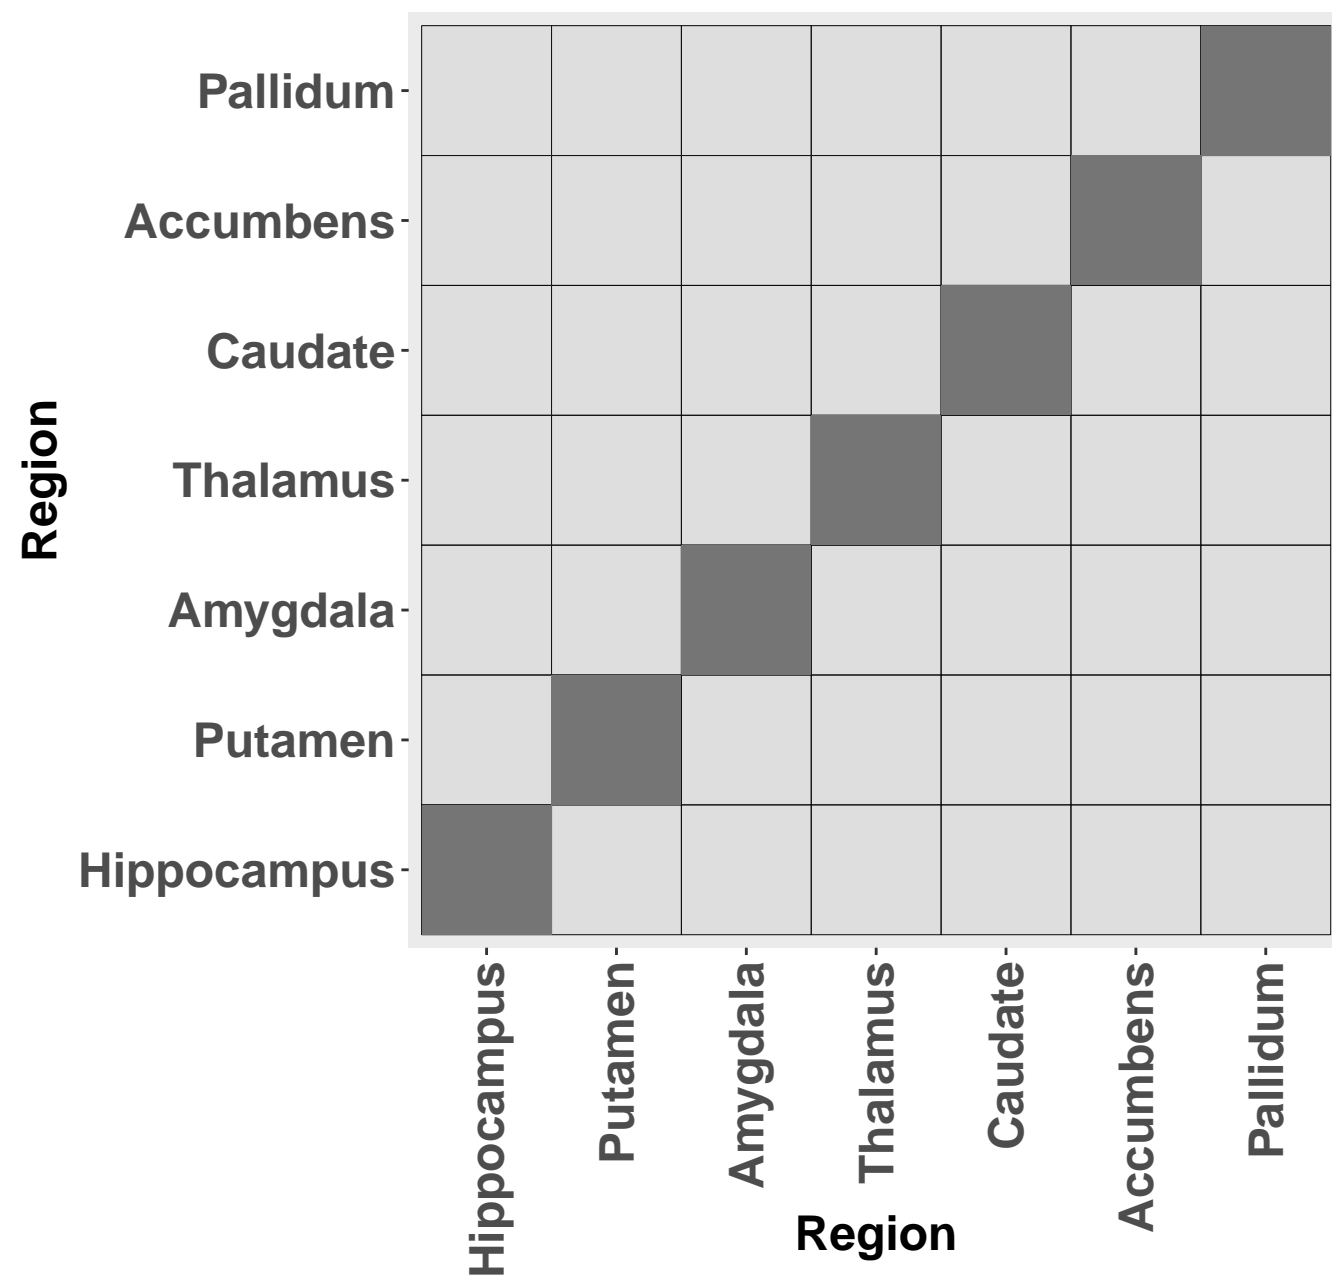

B)

EYO = -15

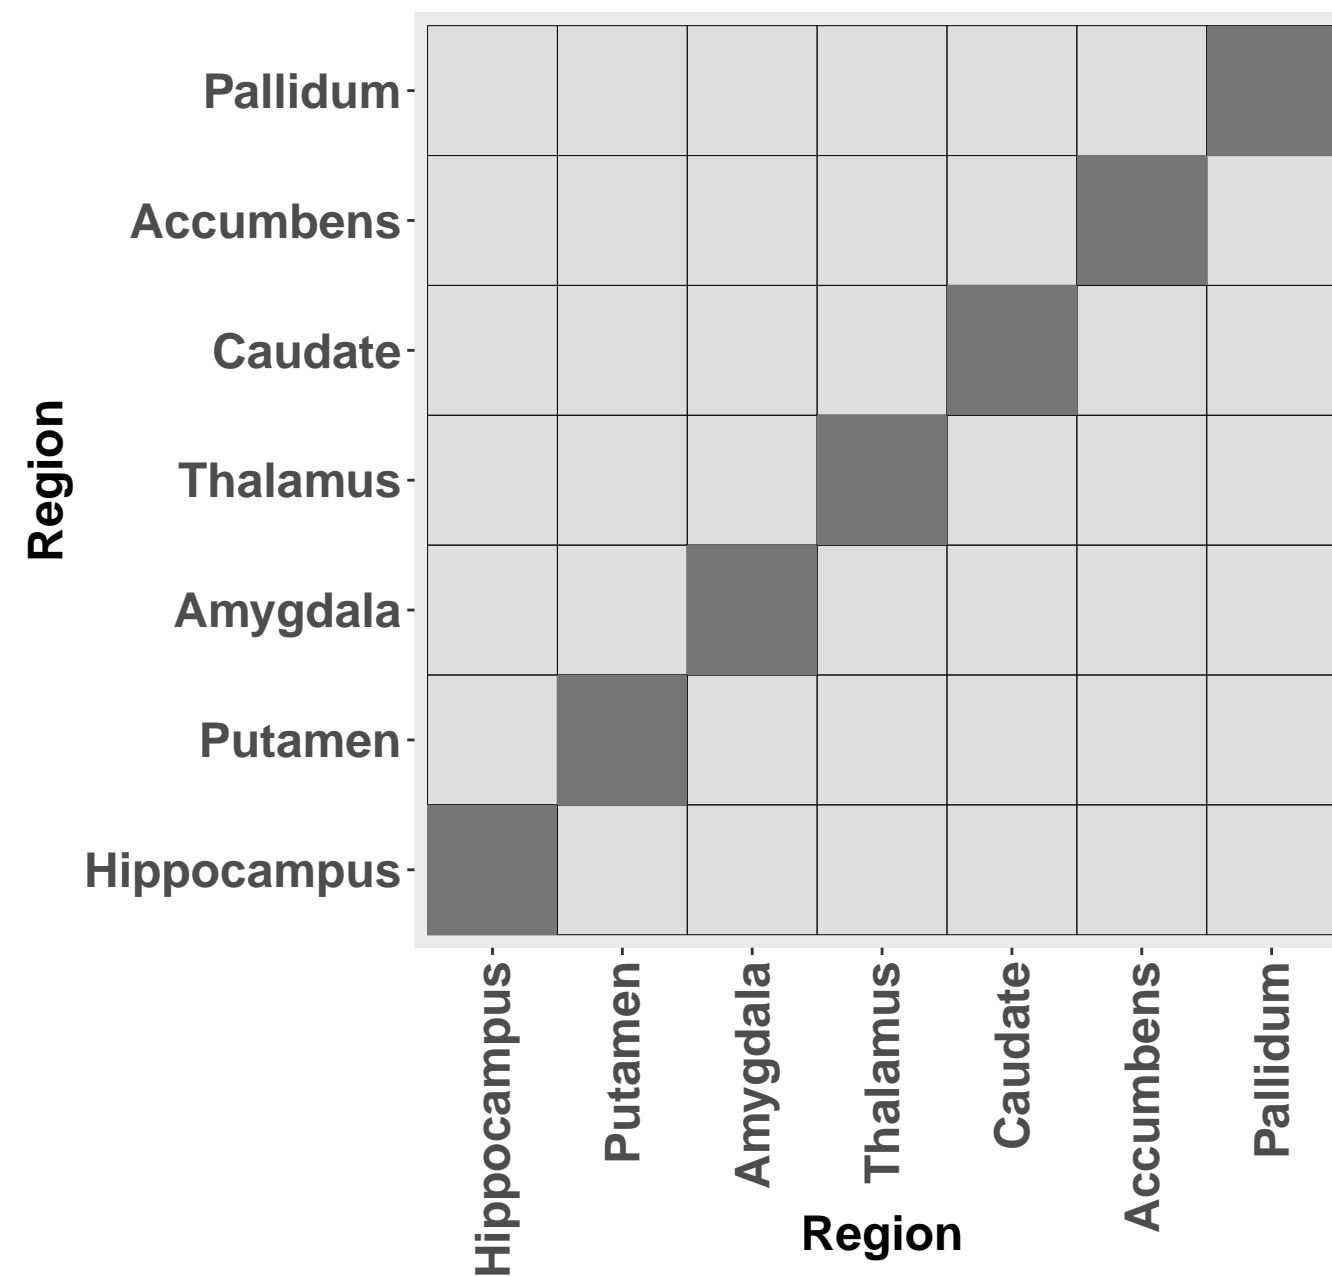

C)

EYO = -5

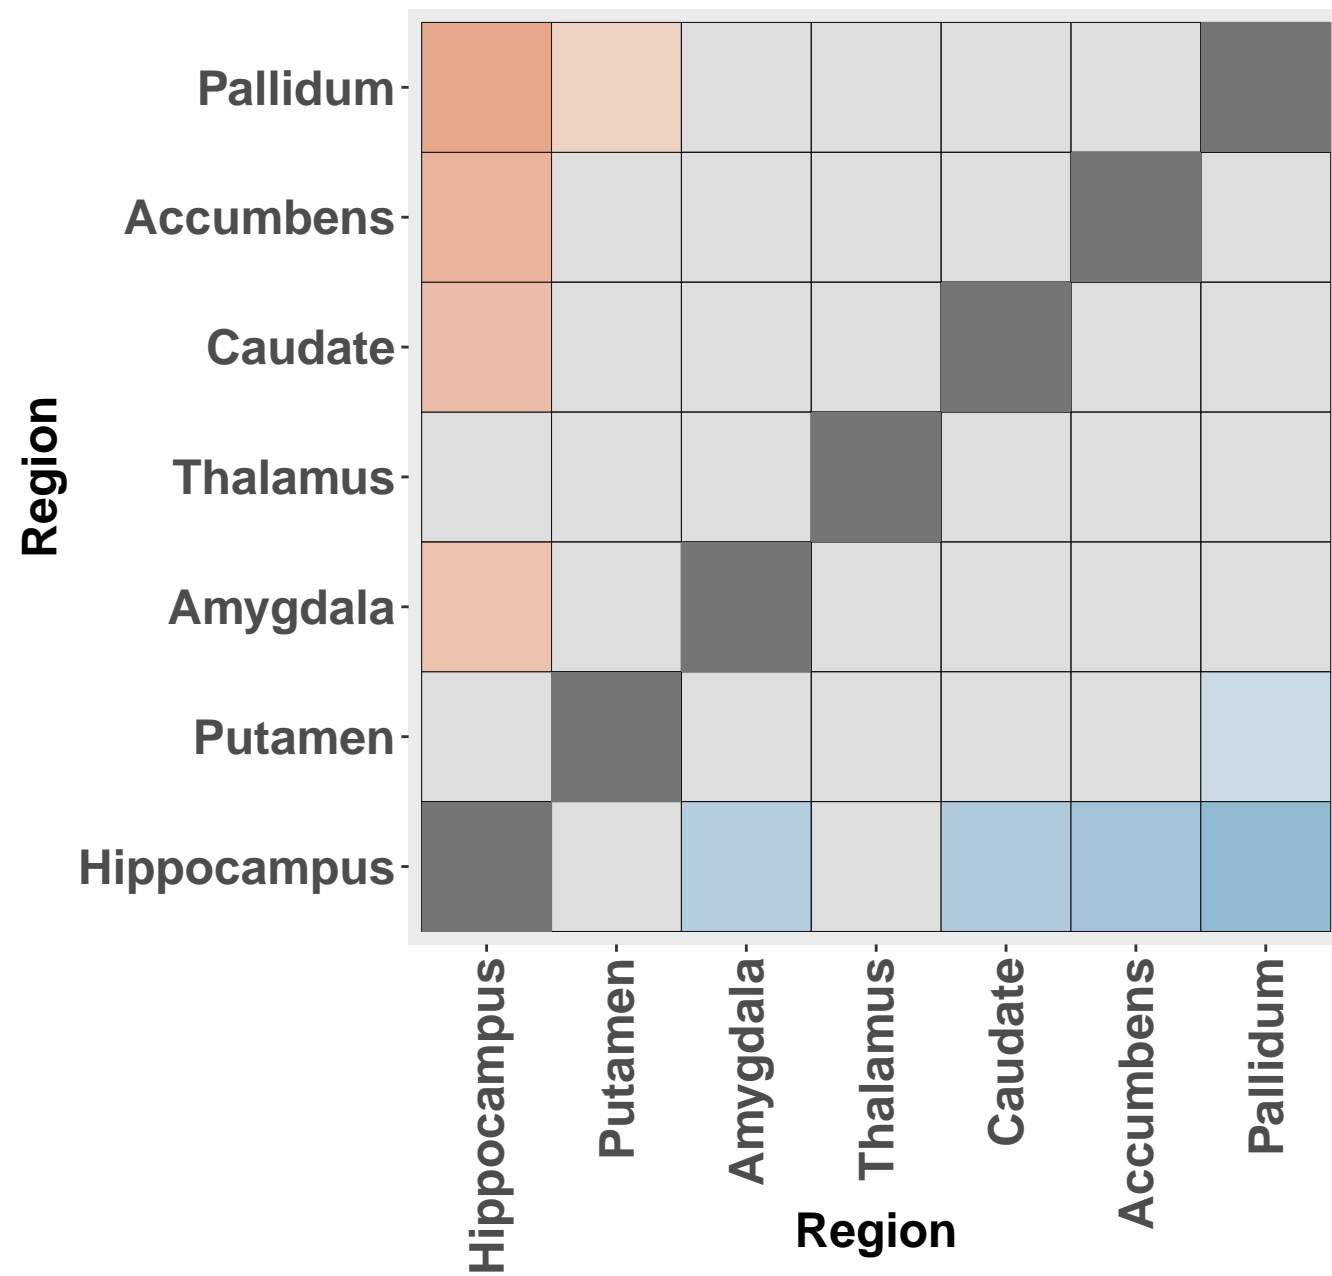

D)

EYO = 5

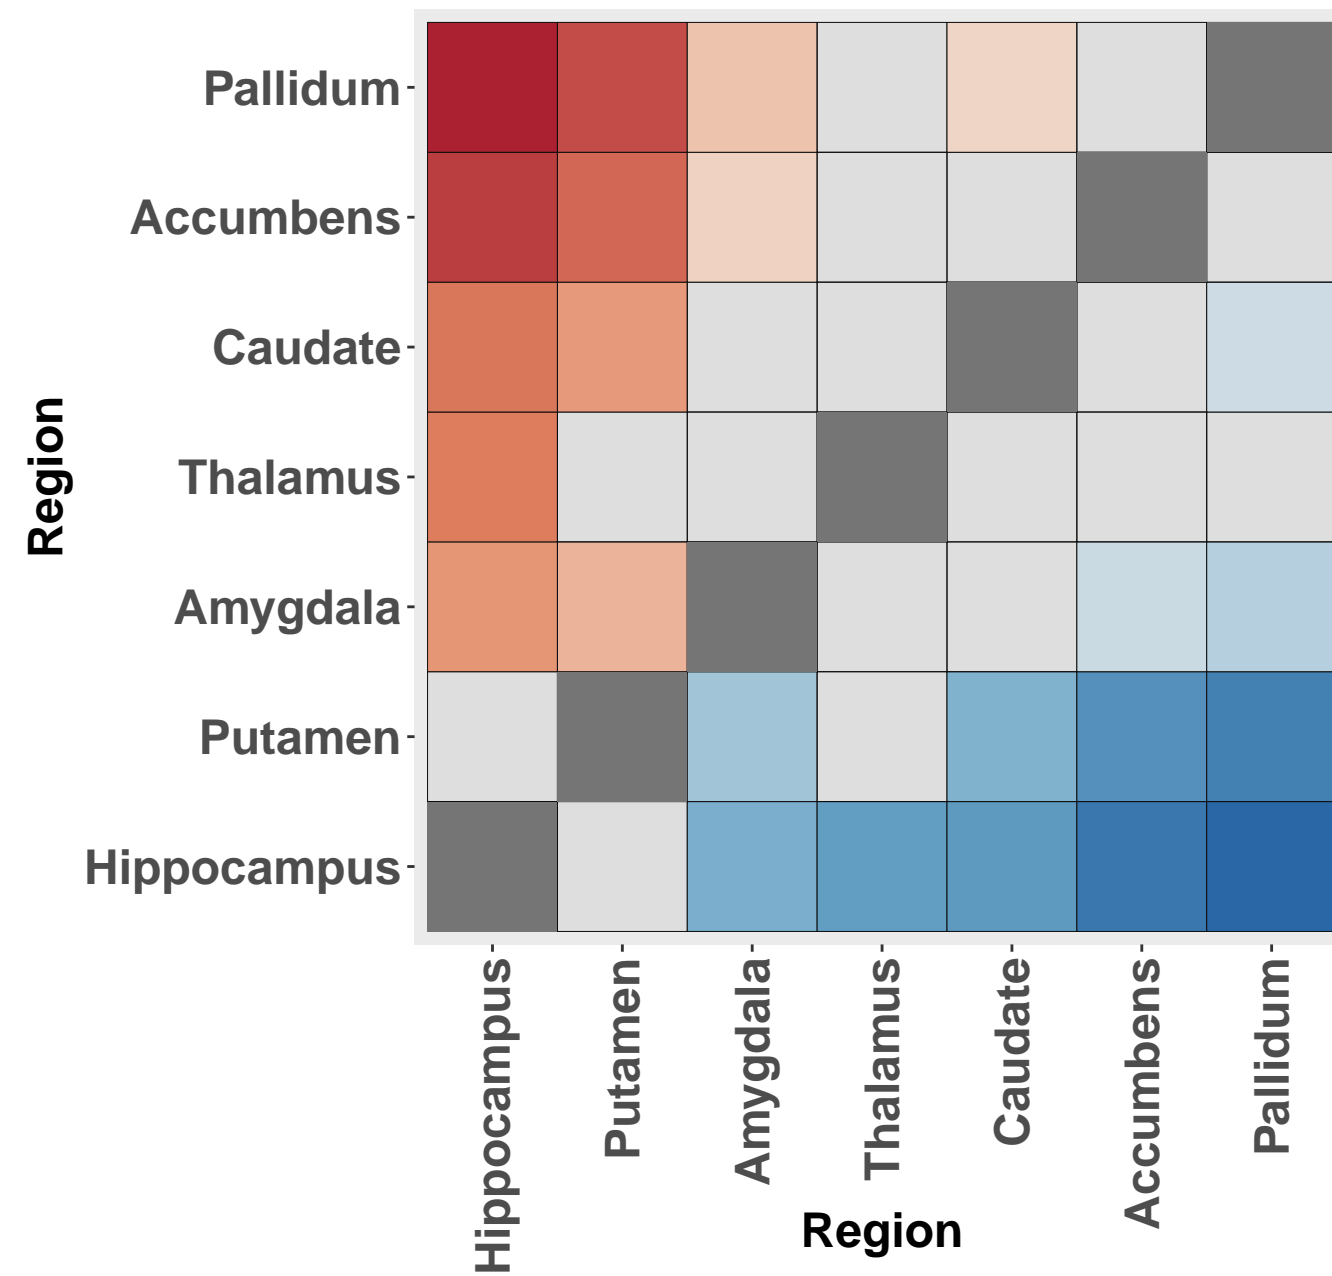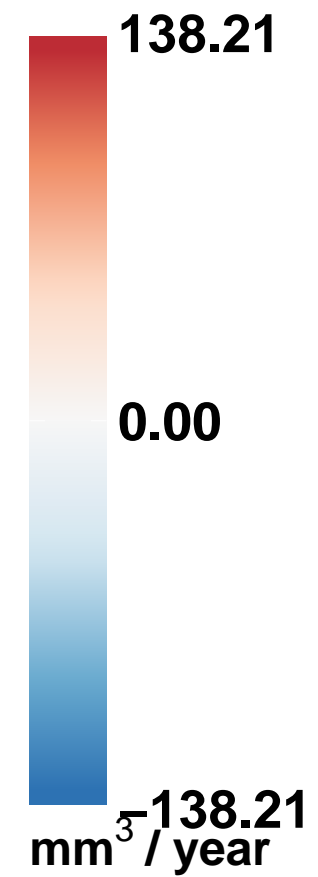

Supplement: NIHMS941123-supplement-8.pdf [file NIHMS941123-supplement-8.pdf]
